# Supplementary material for: Large vessel occlusion prediction scales provide high negative but low positive predictive values in prehospital suspected stroke patients
Source: HighWire-hosted journal article supplement (doi:10.1136/bmjno-2022-000272), 2022-07-01

## SUPPLEMENTAL MATERIALS

### Abbreviations:

LVO, large vessel occlusion; IQR, interquartile range; NIHSS, National Institutes of Health Stroke Scale; CTA, computed tomographic angiography. PLR, positive likelihood ratio; NLR, negative likelihood ratio; PPV, positive predictive value; NPV, negative predictive value; AUC, area under the receiver operating curve; TP, true positives; FN, false negatives; FP, false positives; TN, true negatives; AAW, Asymmetric Arm Weakness; +, positive; CPSS, Cincinnati Prehospital Stroke Scale; C-STAT, Cincinnati Stroke Triage Assessment Tool; FAST-ED, Field Assessment Stroke Triage for Emergency Destination; G-FAST, Gaze-Face-Arm-Speech-Time; mNIHSS, Modified National Institutes of Health Stroke Scale; PASS, Prehospital Acute Stroke Severity; RACE, Rapid Arterial Occlusion Evaluation; SAVE, Speech Arm Vision Eyes; VAN, Vision Aphasia Neglect; ICA, internal carotid artery; M1, first division of the middle cerebral artery; M2, second division of the middle cerebral artery.

### Supplemental Results:

The proportions of clinical characteristics were generally similar between the prevalence study and the diagnostic performance study. This may be due to the lower likelihood of NIHSS subitem documentation among intubated patients, which would lead to exclusion from the diagnostic study. Median age and sex were similar between the final diagnosis categories. Hypertension was more common in patients with non-LVO stroke, and atrial fibrillation was more common in LVO stroke patients. None of the LVO stroke patients had a known history of seizures or a seizure at presentation despite its prevalence of 10% in the diagnostic performance study and 11.4% in the prevalence study. A known history of prior ischemic stroke at the presentation evaluation was more common in the non-LVO stroke patients and mimics than LVO or intracranial hemorrhage patients. The median NIHSS was one point higher in the prevalence study (8 vs 7) though interquartile ranges were similar [4-14 vs 3-14]. Seventy-five out of 184 patients in the diagnostic performance study (41%) had an arrival NIHSS scores < 6, including four out of 29 LVOs (14%), five of 19 intracranial hemorrhages (26%), 17 of the 43 non-LVO ischemic strokes (40%), and 49 of the 93 mimics (53%). A total of 46 patients in the diagnostic performance study received intravenous alteplase. Twenty-one patients received it prior to CTA (46%). Among these patients, alteplase was given a median of 6 minutes before CTA (IQR 3-8 minutes). Intubated patients comprised 5% of the prevalence study compared to 2% of the diagnostic performance study.

**Supplemental Table 1.** Diagnoses in the prevalence and diagnostic performance studies.

| <b>Final Diagnoses</b>              | <b>Prevalence study (n = 220)</b> | <b>Diagnostic performance study subset of patients (n = 184)</b> |
|-------------------------------------|-----------------------------------|------------------------------------------------------------------|
| LVO stroke, n (%)                   | 30 (13.6)                         | 29 (15.8)                                                        |
| Intracranial hemorrhage, n (%)      | 35 (15.9)                         | 19 (10.3)                                                        |
| ICH ≥ 30mL, n                       | 8                                 | 4                                                                |
| Non-LVO ischemic stroke, n (%)      | 45 (20.5)                         | 43 (23.4)                                                        |
| Mimics, n (%)                       | 110 (50)                          | 93 (50.5)                                                        |
| Seizure without status epilepticus  | 22                                | 20                                                               |
| Systemic infection                  | 11                                | 7                                                                |
| Metabolic                           | 8                                 | 7                                                                |
| Illicit drug use                    | 8                                 | 7                                                                |
| Ethanol intoxication                | 7                                 | 5                                                                |
| Psychiatric disease                 | 4                                 | 3                                                                |
| Syncope                             | 4                                 | 4                                                                |
| Transient neurological symptoms     | 4                                 | 4                                                                |
| Fall                                | 4                                 | 4                                                                |
| Malignancy in the CNS               | 4                                 | 4                                                                |
| Trauma                              | 4                                 | 3                                                                |
| Status epilepticus                  | 3                                 | 3                                                                |
| Migraine                            | 3                                 | 3                                                                |
| Transient ischemic attack           | 3                                 | 3                                                                |
| Functional disorder                 | 3                                 | 3                                                                |
| Bell's palsy                        | 3                                 | 2                                                                |
| Recrudescence with systemic illness | 3                                 | 3                                                                |
| Hypertensive emergency              | 2                                 | 2                                                                |
| CNS infection                       | 2                                 | 1                                                                |
| Encephalopathy unspecified          | 2                                 | 1                                                                |
| CRAO                                | 1                                 | 1                                                                |
| TGA                                 | 1                                 | 1                                                                |
| CSVT                                | 1                                 | 1                                                                |
| Spine disease                       | 1                                 | 1                                                                |
| Generalized weakness                | 1                                 | 0                                                                |
| Worsening of chronic arm spasticity | 1                                 | 0                                                                |

LVO, large vessel occlusion; ICH, intracerebral hemorrhage; CNS, central nervous system; CRAO, central retinal artery occlusion; TGA, transient global amnesia; CSVT, cerebral sinus venous thrombosis.

**Supplemental Table 2.** Diagnostic performance statistics for the reference standard of LVO stroke excluding M2s (ICA, M1, or basilar occlusions) including standard and alternative scale thresholds that meet PPV and NPV goals.

Prevalence % (95% CI): 9.8 (6-15)

| LVO stroke excluding M2s                       | PPV % (95% CI) | NPV % (95% CI) | Sensitivity % (95% CI) | Specificity % (95% CI) | PLR (95% CI)  | NLR (95% CI)     |
|------------------------------------------------|----------------|----------------|------------------------|------------------------|---------------|------------------|
| <b>Standard Thresholds</b>                     |                |                |                        |                        |               |                  |
| <b>AAW +</b>                                   | 18 (11-27)     | 99 (94-100)    | 94 (73-100)            | 52 (45-60)             | 2.0 (1.6-2.4) | 0.11 (0.02-0.72) |
| <b>CPSS = 3</b>                                | 23 (13-36)     | 97 (92-99)     | 78 (52-94)             | 72 (65-79)             | 2.8 (2.0-4.0) | 0.31 (0.13-0.73) |
| <b>C-STAT ≥ 2</b>                              | 23 (13-36)     | 96 (91-99)     | 72 (47-90)             | 74 (67-81)             | 2.8 (1.9-4.1) | 0.38 (0.18-0.79) |
| <b>FAST-ED ≥ 4</b>                             | 31 (19-45)     | 99 (96-100)    | 94 (93-100)            | 77 (70-83)             | 4.1 (3.1-5.6) | 0.07 (0.01-0.49) |
| <b>G-FAST ≥ 3</b>                              | 21 (12-31)     | 98 (93-100)    | 89 (65-99)             | 63 (55-70)             | 2.4 (1.8-3.1) | 0.18 (0.05-0.66) |
| <b>mNIHSS ≥ 6</b>                              | 19 (11-28)     | 99 (94-100)    | 95 (73-100)            | 55 (48-63)             | 2.2 (1.7-2.6) | 0.10 (0.01-0.68) |
| <b>NIHSS ≥ 6</b>                               | 16 (09-24)     | 99 (93-100)    | 95 (73-100)            | 45 (37-53)             | 1.7 (1.4-2.0) | 0.13 (0.02-0.84) |
| <b>NIHSS ≥ 10</b>                              | 27 (14-35)     | 99 (95-100)    | 94 (73-100)            | 67 (59-74)             | 2.9 (2.2-3.6) | 0.08 (0.01-0.56) |
| <b>PASS ≥ 2</b>                                | 17 (10-28)     | 95 (90-99)     | 72 (47-90)             | 63 (55-70)             | 1.9 (1.4-2.7) | 0.44 (0.21-0.94) |
| <b>RACE ≥ 5</b>                                | 32 (19-47)     | 98 (94-100)    | 83 (59-96)             | 81 (74-86)             | 4.3 (3.0-6.3) | 0.21 (0.07-0.58) |
| <b>SAVE ≥ 2</b>                                | 19 (11-28)     | 99 (94-100)    | 94 (73-100)            | 55 (47-63)             | 2.1 (1.7-2.6) | 0.10 (0.02-0.68) |
| <b>VAN +</b>                                   | 21 (12-31)     | 99 (95-100)    | 94 (73-100)            | 60 (52-68)             | 2.4 (1.9-3.0) | 0.09 (0.01-0.62) |
| <b>PPV ≥ 80% with highest simultaneous NPV</b> |                |                |                        |                        |               |                  |
| <b>None</b>                                    |                |                |                        |                        |               |                  |

| <b>PPV ≥ 50% with highest simultaneous NPV</b> |            |             |             |             |                |                  |
|------------------------------------------------|------------|-------------|-------------|-------------|----------------|------------------|
| <b>FAST-ED ≥ 7</b>                             | 50 (12-88) | 92 (87-95)  | 17 (04-41)  | 98 (95-100) | 9.2 (2.0-42.4) | 0.85 (0.70-1.04) |
| <b>NPV ≥ 95% with highest simultaneous PPV</b> |            |             |             |             |                |                  |
| <b>CPSS = 3</b>                                | 23 (13-36) | 97 (92-99)  | 78 (52-94)  | 72 (65-79)  | 2.8 (2.0-4.0)  | 0.31 (0.13-0.73) |
| <b>C-STAT ≥ 3</b>                              | 29 (15-46) | 95 (90-98)  | 61 (36-83)  | 84 (77-89)  | 3.8 (2.8-6.2)  | 0.46 (0.26-0.83) |
| <b>FAST-ED ≥ 5</b>                             | 36 (21-54) | 97 (92-99)  | 72 (47-90)  | 86 (80-91)  | 5.1 (3.2-8.4)  | 0.32 (0.15-0.68) |
| <b>G-FAST ≥ 3</b>                              | 21 (12-31) | 98 (93-100) | 89 (65-99)  | 63 (55-70)  | 2.4 (1.8-3.1)  | 0.18 (0.05-0.66) |
| <b>mNIHSS ≥ 14</b>                             | 30 (16-49) | 95 (90-98)  | 56 (31-79)  | 86 (80-91)  | 4.0 (2.3-7.0)  | 0.52 (0.31-0.87) |
| <b>NIHSS ≥ 17</b>                              | 31 (16-50) | 95 (90-98)  | 56 (31-79)  | 87 (81-92)  | 4.3 (3.4-7.4)  | 0.51 (0.31-0.86) |
| <b>PASS = 3</b>                                | 36 (19-56) | 95 (90-98)  | 56 (31-79)  | 89 (83-93)  | 5.1 (2.8-9.3)  | 0.50 (0.30-0.84) |
| <b>RACE ≥ 7</b>                                | 46 (24-68) | 95 (91-98)  | 56 (31-79)  | 93 (88-96)  | 7.7 (3.9-15.2) | 0.48 (0.29-0.80) |
| <b>SAVE ≥ 3</b>                                | 28 (16-43) | 96 (92-99)  | 72 (47-90)  | 80 (73-85)  | 3.5 (2.3-5.3)  | 0.35 (0.17-0.74) |
| <b>VAN +</b>                                   | 21 (12-31) | 99 (95-100) | 94 (73-100) | 60 (52-68)  | 2.4 (1.9-3.0)  | 0.09 (0.01-0.62) |

**Supplemental Table 3.** Diagnostic performance statistics for the reference standard of either LVO stroke excluding M2s (ICA, M1, or basilar occlusions) or intracranial hemorrhage including standard and alternative scale thresholds that meet PPV and NPV goals.

Prevalence % (95% CI): 20.1 (15-27)

| <b>LVO stroke (excluding M2s) or intracranial hemorrhage</b> | <b>PPV % (95% CI)</b> | <b>NPV % (95% CI)</b> | <b>Sensitivity % (95% CI)</b> | <b>Specificity % (95% CI)</b> | <b>PLR (95% CI)</b> | <b>NLR (95% CI)</b> |
|--------------------------------------------------------------|-----------------------|-----------------------|-------------------------------|-------------------------------|---------------------|---------------------|
| <b>Standard Thresholds</b>                                   |                       |                       |                               |                               |                     |                     |
| <b>AAW +</b>                                                 | 34 (25-45)            | 96 (89-99)            | 89 (75-97)                    | 57 (49-65)                    | 2.1 (1.7-2.6)       | 0.19 (0.07-0.48)    |
| <b>CPSS = 3</b>                                              | 43 (31-57)            | 91 (85-96)            | 70 (53-84)                    | 77 (69-83)                    | 3.0 (2.1-4.4)       | 0.39 (0.23-0.64)    |
| <b>C-STAT ≥ 2</b>                                            | 41 (28-55)            | 89 (82-94)            | 62 (45-78)                    | 78 (70-84)                    | 2.8 (1.9-4.1)       | 0.49 (0.32-0.74)    |
| <b>FAST-ED ≥ 4</b>                                           | 47 (34-61)            | 92 (85-96)            | 70 (53-84)                    | 80 (73-86)                    | 3.6 (2.4-.53)       | 0.37 (0.22-0.61)    |
| <b>G-FAST ≥ 3</b>                                            | 38 (27-49)            | 93 (86-97)            | 78 (62-90)                    | 67 (58-74)                    | 2.4 (1.8-3.1)       | 0.32 (0.17-0.61)    |
| <b>mNIHSS ≥ 6</b>                                            | 31 (22-41)            | 90 (82-96)            | 76 (59-88)                    | 57 (49-65)                    | 1.8 (1.4-2.3)       | 0.43 (0.24-0.76)    |
| <b>NIHSS ≥ 6</b>                                             | 28 (20-38)            | 92 (83-97)            | 84 (68-94)                    | 47 (39-55)                    | 1.6 (1.3-1.9)       | 0.35 (0.16-0.73)    |
| <b>NIHSS ≥ 10</b>                                            | 35 (24-47)            | 89 (82-94)            | 68 (50-82)                    | 68 (60-76)                    | 2.1 (1.5-2.9)       | 0.48 (0.30-0.77)    |
| <b>PASS ≥ 2</b>                                              | 32 (22-44)            | 88 (81-94)            | 65 (48-80)                    | 65 (57-73)                    | 1.9 (1.4-2.6)       | 0.54 (0.34-0.85)    |
| <b>RACE ≥ 5</b>                                              | 49 (34-64)            | 90 (83-94)            | 62 (45-76)                    | 84 (77-89)                    | 3.8 (2.4-5.9)       | 0.45 (0.30-0.69)    |
| <b>SAVE ≥ 2</b>                                              | 33 (23-43)            | 92 (85-97)            | 81 (65-92)                    | 58 (49-66)                    | 1.9 (1.5-2.5)       | 0.33 (0.17-0.65)    |
| <b>VAN +</b>                                                 | 34 (24-45)            | 91 (84-96)            | 84 (68-94)                    | 47 (39-55)                    | 1.6 (1.3-1.9)       | 0.35 (0.16-0.73)    |
| <b>PPV ≥ 80% with highest simultaneous NPV</b>               |                       |                       |                               |                               |                     |                     |
| <b>None</b>                                                  |                       |                       |                               |                               |                     |                     |
| <b>PPV ≥ 50% with highest simultaneous NPV</b>               |                       |                       |                               |                               |                     |                     |

|                                                                |            |              |              |            |               |                  |
|----------------------------------------------------------------|------------|--------------|--------------|------------|---------------|------------------|
| <b>FAST-ED <math>\geq</math> 5</b>                             | 53 (36-70) | 88 (82-93)   | 51 (34-68)   | 88 (82-93) | 4.4 (2.6-7.7) | 0.55 (0.39-0.77) |
| <b>PASS = 3</b>                                                | 54 (34-73) | 86 (79-91)   | 41 (25-58)   | 91 (85-95) | 4.6 (2.4-8.8) | 0.65 (0.50-0.86) |
| <b>RACE <math>\geq</math> 6</b>                                | 51 (34-69) | 87 (81-92)   | 49 (32-66)   | 88 (82-93) | 4.2 (2.4-7.3) | 0.58 (0.42-0.80) |
| <b>SAVE = 4</b>                                                | 50 (29-71) | 84 (78-90)   | 32 (18-50)   | 92 (86-96) | 4.0 (1.9-8.1) | 0.74 (0.59-0.92) |
| <b>NPV <math>\geq</math> 95% with highest simultaneous PPV</b> |            |              |              |            |               |                  |
| <b>AAW +</b>                                                   | 34 (25-45) | 96 (89-99)   | 89 (75-97)   | 57 (49-65) | 2.1 (1.7-2.6) | 0.19 (0.07-0.48) |
| <b>FAST-ED <math>\geq</math> 1</b>                             | 26 (19-34) | 100 (91-100) | 100 (91-100) | 27 (20-35) | 1.4 (1.2-1.5) | 0                |
| <b>G-FAST <math>\geq</math> 2</b>                              | 28 (20-36) | 95 (86-99)   | 92 (78-98)   | 40 (32-48) | 1.5 (1.3-1.8) | 0.21 (0.07-0.62) |
| <b>NIHSS <math>\geq</math> 4</b>                               | 26 (19-34) | 96 (86-100)  | 95 (82-99)   | 32 (25-40) | 1.4 (1.2-1.6) | 0.17 (0.04-0.66) |
| <b>PASS <math>\geq</math> 1</b>                                | 25 (18-33) | 98 (87-100)  | 97 (86-100)  | 27 (20-35) | 1.3 (1.2-1.5) | 0.10 (0.01-0.70) |
| <b>SAVE <math>\geq</math> 1</b>                                | 23 (17-31) | 100 (87-100) | 100 (91-100) | 18 (12-25) | 1.2 (1.1-1.3) | 0                |

**Supplemental Table 4.** Diagnostic performance statistics for the reference standard of either LVO stroke (ICA, M1, M2, or basilar occlusions) or intracranial hemorrhage including standard and alternative scale thresholds that meet PPV and NPV goals.

Prevalence % (95% CI): 26.1 (20-33)

| <b>LVO stroke or intracranial hemorrhage</b>   | <b>PPV % (95% CI)</b> | <b>NPV % (95% CI)</b> | <b>Sensitivity % (95% CI)</b> | <b>Specificity % (95% CI)</b> | <b>PLR (95% CI)</b> | <b>NLR (95% CI)</b> |
|------------------------------------------------|-----------------------|-----------------------|-------------------------------|-------------------------------|---------------------|---------------------|
| <b>Standard Thresholds</b>                     |                       |                       |                               |                               |                     |                     |
| <b>AAW +</b>                                   | 41 (31-51)            | 90 (82-95)            | 81 (67-91)                    | 58 (49-67)                    | 1.9 (1.5-2.5)       | 0.32 (0.18-0.59)    |
| <b>CPSS = 3</b>                                | 50 (37-63)            | 86 (78-91)            | 63 (47-76)                    | 78 (70-85)                    | 2.8 (1.9-4.2)       | 0.48 (0.33-0.70)    |
| <b>C-STAT ≥ 2</b>                              | 50 (36-64)            | 84 (77-90)            | 58 (43-72)                    | 79 (72-86)                    | 2.8 (1.9-4.3)       | 0.53 (0.38-0.74)    |
| <b>FAST-ED ≥ 4</b>                             | 58 (44-71)            | 88 (81-93)            | 68 (52-80)                    | 83 (76-89)                    | 3.9 (2.6-6.0)       | 0.40 (0.27-0.60)    |
| <b>G-FAST ≥ 3</b>                              | 46 (35-58)            | 89 (81-94)            | 75 (60-86)                    | 69 (61-77)                    | 2.4 (1.8-3.3)       | 0.36 (0.22-0.60)    |
| <b>mNIHSS ≥ 6</b>                              | 37 (27-48)            | 85 (76-92)            | 71 (56-83)                    | 58 (49-67)                    | 1.7 (1.3-2.2)       | 0.50 (0.32-0.80)    |
| <b>NIHSS ≥ 6</b>                               | 36 (27-46)            | 88 (78-94)            | 81 (67-91)                    | 49 (40-57)                    | 1.6 (1.3-2.0)       | 0.39 (0.21-0.71)    |
| <b>NIHSS ≥ 10</b>                              | 43 (31-55)            | 85 (77-91)            | 65 (50-78)                    | 70 (61-77)                    | 2.1 (1.5-3.0)       | 0.51 (0.34-0.76)    |
| <b>PASS ≥ 2</b>                                | 40 (29-52)            | 84 (75-90)            | 63 (48-76)                    | 67 (58-75)                    | 1.9 (1.4-2.6)       | 0.56 (0.38-0.82)    |
| <b>RACE ≥ 5</b>                                | 53 (38-68)            | 83 (76-89)            | 52 (37-67)                    | 84 (77-90)                    | 3.2 (2.0-5.2)       | 0.57 (0.42-0.78)    |
| <b>SAVE ≥ 2</b>                                | 41 (31-52)            | 89 (81-95)            | 79 (65-90)                    | 60 (52-69)                    | 2.0 (1.6-2.6)       | 0.35 (0.20-0.61)    |
| <b>VAN +</b>                                   | 42 (31-54)            | 87 (79-93)            | 73 (58-85)                    | 65 (56-73)                    | 2.1 (1.6-2.8)       | 0.42 (0.26-0.68)    |
| <b>PPV ≥ 80% with highest simultaneous NPV</b> |                       |                       |                               |                               |                     |                     |
| <b>FAST-ED ≥ 7</b>                             | 83 (36-100)           | 76 (69-82)            | 10 (03-23)                    | 99 (96-100)                   | 14 (1.7-118.0)      | 0.90 (0.82-1.0)     |
| <b>PPV ≥ 50% with highest simultaneous NPV</b> |                       |                       |                               |                               |                     |                     |

|                                                |            |              |              |            |                |                  |
|------------------------------------------------|------------|--------------|--------------|------------|----------------|------------------|
| <b>CPSS = 3</b>                                | 50 (37-63) | 86 (78-91)   | 63 (47-76)   | 78 (70-85) | 2.8 (1.9-4.2)  | 0.48 (0.33-0.70) |
| <b>C-STAT ≥ 2</b>                              | 50 (36-64) | 84 (77-90)   | 58 (43-72)   | 79 (72-86) | 2.8 (1.9-4.3)  | 0.53 (0.38-0.74) |
| <b>FAST-ED ≥ 4</b>                             | 58 (44-71) | 88 (81-93)   | 68 (52-80)   | 83 (76-89) | 3.9 (2.6-6.0)  | 0.40 (0.27-0.60) |
| <b>G-FAST = 4</b>                              | 58 (39-76) | 80 (73-86)   | 38 (24-53)   | 90 (84-95) | 3.9 (2.1-7.4)  | 0.69 (0.55-0.87) |
| <b>mNIHSS ≥ 13</b>                             | 51 (34-69) | 80 (73-86)   | 38 (24-53)   | 88 (80-93) | 3.0 (1.7-5.3)  | 0.71 (0.57-0.90) |
| <b>NIHSS ≥ 14</b>                              | 54 (39-69) | 84 (77-90)   | 54 (39-69)   | 84 (77-90) | 3.4 (2.1-5.3)  | 0.55 (0.40-0.75) |
| <b>PASS = 3</b>                                | 68 (48-84) | 81 (74-87)   | 40 (26-55)   | 93 (88-97) | 6.0 (2.9-12.3) | 0.65 (0.51-0.82) |
| <b>RACE ≥ 5</b>                                | 53 (38-68) | 83 (76-89)   | 52 (37-67)   | 84 (77-90) | 3.2 (2.0-5.2)  |                  |
| <b>SAVE ≥ 3</b>                                | 55 (40-70) | 84 (77-90)   | 54 (39-69)   | 85 (77-90) | 3.5 (2.2-5.6)  | 0.54 (0.40-0.74) |
| <b>NPV ≥ 95% with highest simultaneous PPV</b> |            |              |              |            |                |                  |
| <b>CPSS ≥ 1</b>                                | 30 (23-38) | 96 (80-100)  | 98 (89-100)  | 18 (12-26) | 1.2 (1.1-1.3)  | 0.11 (0.02-0.81) |
| <b>FAST-ED ≥ 1</b>                             | 33 (25-41) | 98 (87-100)  | 98 (89-100)  | 29 (21-37) | 1.4 (1.2-1.5)  | 0.07 (0.01-0.51) |
| <b>G-FAST ≥ 1</b>                              | 29 (22-37) | 96 (79-100)  | 98 (89-100)  | 17 (11-24) | 1.2 (1.1-1.3)  | 0.12 (0.02-0.89) |
| <b>NIHSS ≥ 3</b>                               | 31 (23-38) | 97 (83-100)  | 98 (89-100)  | 21 (15-29) | 1.2 (1.1-1.4)  | 0.10 (0.01-0.70) |
| <b>SAVE ≥ 1</b>                                | 30 (23-38) | 100 (87-100) | 100 (93-100) | 19 (13-27) | 1.2 (1.1-1.3)  | 0                |



**Supplemental Table 5.** Diagnostic statistics for the reference standard of LVO stroke excluding M2s (ICA, M1, or basilar occlusions).

Prevalence % (95% CI): 9.8 (6-15).

| LVO (excluding M2s) scale threshold | Sensitivity (95% CI) | Specificity (95% CI) | PLR (95% CI)   | NLR (95% CI)     | PPV (95% CI) | NPV (95% CI) | AUC  | TP | FN | FP  | TN  | Total |
|-------------------------------------|----------------------|----------------------|----------------|------------------|--------------|--------------|------|----|----|-----|-----|-------|
| AAW                                 |                      |                      |                |                  |              |              | 0.73 |    |    |     |     |       |
| +                                   | 94 (73-100)          | 52 (45-60)           | 2.0 (1.6-2.4)  | 0.11 (0.02-0.72) | 18 (11-27)   | 99 (94-100)  |      | 17 | 1  | 79  | 87  | 184   |
| CPSS                                |                      |                      |                |                  |              |              | 0.78 |    |    |     |     |       |
| ≥ 1                                 | 100 (82-100)         | 16 (11-22)           | 1.2 (1.1-1.3)  | 0                | 11 (07-17)   | 100 (87-100) |      | 18 | 0  | 140 | 26  | 184   |
| ≥ 2                                 | 94 (73-100)          | 41 (33-49)           | 1.6 (1.4-1.9)  | 0.14 (0.02-0.92) | 15 (09-23)   | 99 (92-100)  |      | 17 | 1  | 98  | 68  | 184   |
| = 3                                 | 78 (52-94)           | 72 (65-79)           | 2.8 (2.0-4.0)  | 0.31 (0.13-0.73) | 23 (13-36)   | 97 (92-99)   |      | 14 | 4  | 46  | 120 | 184   |
| C-STAT                              |                      |                      |                |                  |              |              | 0.79 |    |    |     |     |       |
| ≥ 1                                 | 89 (65-99)           | 49 (42-57)           | 1.8 (1.4-2.2)  | 0.23 (0.06-0.84) | 16 (09-25)   | 98 (92-100)  |      | 16 | 2  | 84  | 82  | 184   |
| ≥ 2                                 | 72 (47-90)           | 74 (67-81)           | 2.8 (1.9-4.1)  | 0.38 (0.18-0.79) | 23 (13-36)   | 96 (91-99)   |      | 13 | 5  | 43  | 123 | 184   |
| ≥ 3                                 | 61 (36-83)           | 84 (77-89)           | 3.8 (2.8-6.2)  | 0.46 (0.26-0.83) | 29 (15-46)   | 95 (90-98)   |      | 11 | 7  | 27  | 139 | 184   |
| = 4                                 | 39 (17-64)           | 93 (88-96)           | 5.4 (2.4-11.9) | 0.66 (0.46-0.96) | 37 (16-62)   | 93 (88-97)   |      | 7  | 11 | 12  | 154 | 184   |
| FAST-ED                             |                      |                      |                |                  |              |              | 0.88 |    |    |     |     |       |
| ≥ 1                                 | 100 (82-100)         | 24 (18-31)           | 1.3 (1.2-1.4)  | 0                | 13 (8-19)    | 100 (91-100) |      | 18 | 0  | 126 | 40  | 184   |
| ≥ 2                                 | 94 (73-100)          | 47 (39-55)           | 1.8 (1.5-2.1)  | 0.12 (0.02-0.80) | 16 (10-25)   | 99 (93-100)  |      | 17 | 1  | 88  | 78  | 184   |
| ≥ 3                                 | 94 (73-100)          | 65 (57-72)           | 2.7 (2.1-3.4)  | 0.09 (0.01-0.58) | 23 (14-34)   | 99 (95-100)  |      | 17 | 1  | 58  | 108 | 184   |
| ≥ 4                                 | 94 (93-100)          | 77 (70-83)           | 4.1 (3.1-5.6)  | 0.07 (0.01-0.49) | 31 (19-45)   | 99 (96-100)  |      | 17 | 1  | 38  | 128 | 184   |
| ≥ 5                                 | 72 (47-90)           | 86 (80-91)           | 5.1 (3.2-8.4)  | 0.32 (0.15-0.68) | 36 (21-54)   | 97 (92-99)   |      | 13 | 5  | 23  | 143 | 184   |
| ≥ 6                                 | 33 (13-59)           | 95 (90-98)           | 6.2 (2.5-15.2) | 0.71 (0.51-0.98) | 40 (16-68)   | 93 (88-96)   |      | 6  | 12 | 9   | 157 | 184   |
| ≥ 7                                 | 17 (04-41)           | 98 (95-100)          | 9.2 (2.0-42.4) | 0.85 (0.70-1.04) | 50 (12-88)   | 92 (87-95)   |      | 3  | 15 | 3   | 163 | 184   |
| ≥ 8                                 | 0                    | 100 (98-100)*        | -              | 1.00             | -            | 90 (90-90)*  |      | 0  | 18 | 0   | 166 | 184   |
| = 9                                 | 0                    | 100 (98-100)*        | -              | 1.00             | -            | 90 (90-90)*  |      | 0  | 18 | 0   | 166 | 184   |
| G-FAST                              |                      |                      |                |                  |              |              | 0.81 |    |    |     |     |       |
| ≥ 1                                 | 100 (82-100)         | 15 (09-21)           | 1.2 (1.1-1.2)  | 0                | 11 (07-17)   | 100 (86-100) |      | 18 | 0  | 142 | 24  | 184   |
| ≥ 2                                 | 100 (82-100)         | 37 (29-45)           | 1.6 (1.4-1.8)  | 0                | 15 (09-22)   | 100 (94-100) |      | 18 | 0  | 105 | 61  | 184   |
| ≥ 3                                 | 89 (65-99)           | 63 (55-70)           | 2.4 (1.8-3.1)  | 0.18 (0.05-0.66) | 21 (12-31)   | 98 (93-100)  |      | 16 | 2  | 62  | 104 | 184   |
| = 4                                 | 50 (26-74)           | 87 (81-92)           | 3.8 (2.1-6.9)  | 0.58 (0.36-0.92) | 29 (14-48)   | 94 (89-97)   |      | 9  | 9  | 22  | 144 | 184   |
| mNIHSS                              |                      |                      |                |                  |              |              | 0.81 |    |    |     |     |       |
| ≥ 2                                 | 100 (82-100)         | 22 (16-29)           | 1.3 (1.2-1.4)  | 0                | 12 (7-19)    | 100 (90-100) |      | 18 | 0  | 130 | 36  | 184   |
| ≥ 3                                 | 94 (73-100)          | 32 (25-40)           | 1.4 (1.2-1.6)  | 0.17 (0.03-1.18) | 13 (8-20)    | 98 (90-100)  |      | 17 | 1  | 113 | 53  | 184   |
| ≥ 4                                 | 94 (73-100)          | 41 (33-49)           | 1.6 (1.4-1.9)  | 0.14 (0.02-0.92) | 15 (9-27)    | 99 (92-100)  |      | 17 | 1  | 98  | 68  | 184   |
| ≥ 5                                 | 94 (73-100)          | 47 (39-55)           | 1.8 (1.5-2.1)  | 0.12 (0.02-0.80) | 16 (10-25)   | 99 (92-100)  |      | 17 | 1  | 88  | 78  | 184   |
| ≥ 6                                 | 95 (73-100)          | 55 (48-63)           | 2.2 (1.7-2.6)  | 0.10 (0.01-0.68) | 19 (11-28)   | 99 (94-100)  |      | 17 | 1  | 74  | 92  | 184   |
| ≥ 7                                 | 89 (65-99)           | 60 (52-67)           | 2.2 (1.7-2.8)  | 0.19 (0.05-0.69) | 19 (11-29)   | 98 (93-100)  |      | 16 | 2  | 67  | 99  | 184   |
| ≥ 8                                 | 89 (65-99)           | 66 (58-73)           | 2.6 (2.0-3.4)  | 0.17 (0.05-0.63) | 22 (13-33)   | 98 (93-100)  |      | 16 | 2  | 57  | 109 | 184   |
| ≥ 9                                 | 89 (65-98)           | 71 (64-78)           | 3.1 (2.3-4.1)  | 0.16 (0.04-0.58) | 25 (15-37)   | 98 (94-100)  |      | 16 | 2  | 48  | 118 | 184   |
| ≥ 10                                | 83 (59-96)           | 75 (68-82)           | 3.4 (2.4-4.7)  | 0.22 (0.08-0.62) | 27 (16-40)   | 98 (93-100)  |      | 15 | 3  | 41  | 125 | 184   |
| ≥ 14                                | 56 (31-79)           | 86 (80-91)           | 4.0 (2.3-7.0)  | 0.52 (0.31-0.87) | 30 (16-49)   | 95 (90-98)   |      | 10 | 8  | 23  | 143 | 184   |
| ≥ 15                                | 44 (22-69)           | 88 (82-93)           | 3.7 (1.9-7.1)  | 0.63 (0.42-0.96) | 29 (13-49)   | 94 (89-97)   |      | 8  | 10 | 20  | 146 | 184   |
| NIHSS                               |                      |                      |                |                  |              |              | 0.83 |    |    |     |     |       |
| ≥ 2                                 | 100 (82-100)         | 11 (7-17)            | 1.1 (1.0-1.2)  | 0                | 11 (7-17)    | 100 (82-100) |      | 18 | 0  | 147 | 19  | 184   |
| ≥ 3                                 | 100 (82-100)         | 18 (13-25)           | 1.2 (1.1-1.3)  | 0                | 12 (7-18)    | 100 (88-100) |      | 18 | 0  | 136 | 30  | 184   |

|      |              |             |                |                  |            |              |      |    |     |     |     |
|------|--------------|-------------|----------------|------------------|------------|--------------|------|----|-----|-----|-----|
| ≥ 4  | 94 (73-100)  | 29 (22-36)  | 1.3 (1.2-1.5)  | 0.19 (0.03-1.31) | 13 (8-19)  | 98 (89-100)  | 17   | 1  | 118 | 48  | 184 |
| ≥ 5  | 94 (73-100)  | 36 (28-43)  | 1.5 (1.3-1.7)  | 0.16 (0.23-1.06) | 14 (8-21)  | 98 (91-100)  | 17   | 1  | 107 | 59  | 184 |
| ≥ 6  | 95 (73-100)  | 45 (37-53)  | 1.7 (1.4-2.0)  | 0.13 (0.02-0.84) | 16 (9-24)  | 99 (93-100)  | 17   | 1  | 92  | 74  | 184 |
| ≥ 7  | 94 (73-100)  | 53 (45-61)  | 2.0 (1.7-2.5)  | 0.11 (0.02-0.71) | 18 (11-27) | 99 (94-100)  | 17   | 1  | 78  | 88  | 184 |
| ≥ 8  | 94 (73-100)  | 55 (48-63)  | 2.1 (1.7-2.6)  | 0.10 (0.01-0.68) | 19 (11-28) | 99 (94-100)  | 17   | 1  | 74  | 92  | 184 |
| ≥ 9  | 94 (73-100)  | 59 (51-67)  | 2.3 (1.9-2.9)  | 0.09 (0.01-0.64) | 20 (12-30) | 99 (95-100)  | 17   | 1  | 68  | 98  | 184 |
| ≥ 10 | 94 (73-100)  | 67 (59-74)  | 2.9 (2.2-3.6)  | 0.08 (0.01-0.56) | 27 (14-35) | 99 (95-100)  | 17   | 1  | 55  | 111 | 184 |
| ≥ 17 | 56 (31-79)   | 87 (81-92)  | 4.3 (3.4-7.4)  | 0.51 (0.31-0.86) | 31 (16-50) | 95 (90-98)   | 10   | 8  | 22  | 144 | 184 |
| ≥ 18 | 50 (26-74)   | 88 (82-93)  | 4.2 (2.2-7.7)  | 0.57 (0.36-0.91) | 31 (15-51) | 94 (89-97)   | 9    | 9  | 20  | 146 | 184 |
| PASS |              |             |                |                  |            |              | 0.77 |    |     |     |     |
| ≥ 1  | 100 (82-100) | 25 (18-32)  | 1.3 (1.2-1.5)  | 0                | 13 (8-19)  | 100 (91-100) | 18   | 0  | 125 | 41  | 184 |
| ≥ 2  | 72 (47-90)   | 63 (55-70)  | 1.9 (1.4-2.7)  | 0.44 (0.21-0.94) | 17 (10-28) | 95 (90-99)   | 13   | 5  | 62  | 104 | 184 |
| = 3  | 56 (31-79)   | 89 (83-93)  | 5.1 (2.8-9.3)  | 0.50 (0.30-0.84) | 36 (19-56) | 95 (90-98)   | 10   | 8  | 18  | 148 | 184 |
| RACE |              |             |                |                  |            |              | 0.86 |    |     |     |     |
| ≥ 1  | 94 (73-100)  | 29 (22-36)  | 1.3 (1.2-1.5)  | 0.19 (0.03-1.31) | 13 (8-19)  | 98 (89-100)  | 17   | 1  | 118 | 48  | 184 |
| ≥ 2  | 94 (73-100)  | 46 (38-54)  | 1.7 (1.5-2.1)  | 0.12 (0.02-0.82) | 16 (10-24) | 99 (93-100)  | 17   | 1  | 90  | 76  | 184 |
| ≥ 3  | 94 (73-100)  | 62 (54-70)  | 2.5 (2.0-3.1)  | 0.09 (0.01-0.60) | 21 (13-32) | 99 (95-100)  | 17   | 1  | 63  | 103 | 184 |
| ≥ 4  | 94 (73-100)  | 69 (61-76)  | 3.0 (2.3-3.9)  | 0.08 (0.01-0.55) | 25 (15-37) | 99 (95-100)  | 17   | 1  | 52  | 114 | 184 |
| ≥ 5  | 83 (59-96)   | 81 (74-86)  | 4.3 (3.0-6.3)  | 0.21 (0.07-0.58) | 32 (19-47) | 98 (94-100)  | 15   | 3  | 32  | 134 | 184 |
| ≥ 6  | 72 (47-90)   | 87 (81-92)  | 5.5 (3.7-8.8)  | 0.32 (0.15-0.68) | 37 (22-55) | 97 (93-99)   | 13   | 5  | 22  | 144 | 184 |
| ≥ 7  | 56 (31-79)   | 93 (88-96)  | 7.7 (3.9-15.2) | 0.48 (0.29-0.80) | 46 (24-68) | 95 (91-98)   | 10   | 8  | 12  | 154 | 184 |
| ≥ 8  | 17 (04-41)   | 96 (92-98)  | 4.0 (1.1-14.0) | 0.87 (0.71-1.07) | 30 (07-65) | 92 (86-95)   | 3    | 15 | 7   | 159 | 184 |
| = 9  | 06 (00-27)   | 98 (95-100) | 3.1 (0.3-28.0) | 0.96 (0.86-1.08) | 25 (01-81) | 91 (85-94)   | 1    | 17 | 3   | 163 | 184 |
| SAVE |              |             |                |                  |            |              | 0.83 |    |     |     |     |
| ≥ 1  | 100 (82-100) | 16 (11-22)  | 1.2 (1.1-1.3)  | 0                | 11 (7-17)  | 100 (87-100) | 18   | 0  | 140 | 26  | 184 |
| ≥ 2  | 94 (73-100)  | 55 (47-63)  | 2.1 (1.7-2.6)  | 0.10 (0.02-0.68) | 19 (11-28) | 99 (94-100)  | 17   | 1  | 75  | 91  | 184 |
| ≥ 3  | 72 (47-90)   | 80 (73-85)  | 3.5 (2.3-5.3)  | 0.35 (0.17-0.74) | 28 (16-43) | 96 (92-99)   | 13   | 5  | 34  | 132 | 184 |
| = 4  | 44 (22-69)   | 90 (85-94)  | 4.6 (2.3-9.2)  | 0.62 (0.41-0.93) | 33 (16-55) | 94 (89-97)   | 8    | 10 | 16  | 150 | 184 |
| VAN  |              |             |                |                  |            |              | 0.77 |    |     |     |     |
| +    | 94 (73-100)  | 60 (52-68)  | 2.4 (1.9-3.0)  | 0.09 (0.01-0.62) | 21 (12-31) | 99 (95-100)  | 17   | 1  | 66  | 100 | 184 |

\*NPV for thresholds with zero positive cases is 1-prevalence. Specificity and NPV CIs from [https://www.medcalc.org/calc/diagnostic\\_test.php](https://www.medcalc.org/calc/diagnostic_test.php)

**Supplemental Table 6.** Diagnostic statistics for the reference standard of LVO stroke (ICA, M1, M2, or basilar occlusions).

Prevalence % (95% CI): 15.8 (11-22).

| LVO scale threshold | Sensitivity (95% CI) | Specificity (95% CI) | PLR (95% CI)   | NLR (95% CI)     | PPV (95% CI) | NPV (95% CI) | AUC  | TP | FN | FP  | TN  | Total |
|---------------------|----------------------|----------------------|----------------|------------------|--------------|--------------|------|----|----|-----|-----|-------|
| AAW                 |                      |                      |                |                  |              |              | 0.66 |    |    |     |     |       |
| +                   | 79 (60-92)           | 53 (45-61)           | 1.7 (1.3-2.2)  | 0.39 (0.19-0.81) | 24 (16-34)   | 93 (86-98)   |      | 23 | 6  | 73  | 82  | 184   |
| CPSS                |                      |                      |                |                  |              |              | 0.72 |    |    |     |     |       |
| ≥ 1                 | 97 (82-100)          | 16 (11-23)           | 1.2 (1.0-1.3)  | 0.21 (0.03-1.52) | 18 (12-25)   | 96 (80-100)  |      | 28 | 1  | 130 | 25  | 184   |
| ≥ 2                 | 90 (73-98)           | 43 (35-51)           | 1.6 (1.3-1.9)  | 0.24 (0.08-0.72) | 23 (15-31)   | 96 (88-99)   |      | 26 | 3  | 89  | 66  | 184   |
| = 3                 | 62 (42-79)           | 73 (65-80)           | 2.3 (1.6-3.4)  | 0.52 (0.32-0.84) | 30 (19-43)   | 91 (85-96)   |      | 18 | 11 | 42  | 113 | 184   |
| C-STAT              |                      |                      |                |                  |              |              | 0.72 |    |    |     |     |       |
| ≥ 1                 | 76 (57-90)           | 50 (42-58)           | 1.5 (1.2-2.0)  | 0.49 (0.25-0.94) | 22 (14-31)   | 92 (84-97)   |      | 22 | 7  | 78  | 77  | 184   |
| ≥ 2                 | 62 (42-79)           | 76 (68-82)           | 2.5 (1.7-3.8)  | 0.50 (0.31-0.81) | 32 (20-46)   | 91 (85-96)   |      | 18 | 11 | 38  | 117 | 184   |
| ≥ 3                 | 55 (35-74)           | 86 (79-91)           | 3.9 (2.3-6.5)  | 0.52 (0.35-0.79) | 42 (26-59)   | 91 (85-95)   |      | 16 | 13 | 22  | 133 | 184   |
| = 4                 | 31 (15-51)           | 94 (89-97)           | 4.8 (2.1-10.8) | 0.74 (0.58-0.94) | 47 (24-71)   | 88 (82-92)   |      | 9  | 20 | 10  | 145 | 184   |
| FAST-ED             |                      |                      |                |                  |              |              | 0.83 |    |    |     |     |       |
| ≥ 1                 | 97 (82-100)          | 25 (19-33)           | 1.3 (1.2-1.5)  | 0.14 (0.02-0.96) | 19 (13-27)   | 98 (87-100)  |      | 28 | 1  | 116 | 39  | 184   |
| ≥ 2                 | 90 (73-98)           | 49 (41-57)           | 1.8 (1.4-2.1)  | 0.21 (0.07-0.62) | 25 (17-34)   | 96 (89-99)   |      | 26 | 3  | 79  | 76  | 184   |
| ≥ 3                 | 86 (68-96)           | 68 (60-75)           | 2.7 (2.0-3.5)  | 0.20 (0.08-0.51) | 33 (23-45)   | 96 (91-99)   |      | 25 | 4  | 50  | 105 | 184   |
| ≥ 4                 | 79 (60-92)           | 79 (72-85)           | 3.8 (2.7-5.5)  | 0.26 (0.13-0.53) | 42 (29-56)   | 95 (90-98)   |      | 23 | 6  | 32  | 123 | 184   |
| ≥ 5                 | 59 (39-77)           | 88 (82-93)           | 4.8 (2.8-8.1)  | 0.47 (0.31-0.73) | 47 (30-65)   | 92 (86-96)   |      | 17 | 12 | 19  | 136 | 184   |
| ≥ 6                 | 28 (13-47)           | 96 (91-98)           | 6.1 (2.4-15.5) | 0.76 (0.60-0.95) | 53 (27-79)   | 88 (82-92)   |      | 8  | 21 | 7   | 148 | 184   |
| ≥ 7                 | 17 (06-36)           | 99 (97-100)          | 27 (3.2-220.0) | 0.83 (0.71-0.98) | 83 (36-100)  | 87 (81-91)   |      | 5  | 24 | 1   | 154 | 184   |
| ≥ 8                 | 0                    | 100 (98-100)*        | -              | 1.0              | -            | 84 (84-84)*  |      | 0  | 29 | 0   | 155 | 184   |
| = 9                 | 0                    | 100 (98-100)*        | -              | 1.0              | -            | 84 (84-84)*  |      | 0  | 29 | 0   | 155 | 184   |
| G-FAST              |                      |                      |                |                  |              |              | 0.76 |    |    |     |     |       |
| ≥ 1                 | 97 (82-100)          | 15 (10-21)           | 1.1 (1.0-1.3)  | 0.23 (0.03-1.65) | 18 (12-24)   | 96 (79-100)  |      | 28 | 1  | 132 | 23  | 184   |
| ≥ 2                 | 93 (77-99)           | 38 (30-46)           | 1.5 (1.3-1.8)  | 0.18 (0.05-0.70) | 22 (15-30)   | 97 (89-99)   |      | 27 | 2  | 96  | 59  | 184   |
| ≥ 3                 | 79 (60-92)           | 65 (56-72)           | 2.2 (1.7-3.0)  | 0.32 (0.16-0.66) | 30 (20-41)   | 94 (88-98)   |      | 23 | 6  | 55  | 100 | 184   |
| = 4                 | 41 (24-61)           | 88 (82-93)           | 3.4 (1.8-6.2)  | 0.67 (0.49-0.91) | 39 (22-58)   | 89 (83-93)   |      | 12 | 17 | 19  | 136 | 184   |
| mNIHSS              |                      |                      |                |                  |              |              | 0.74 |    |    |     |     |       |
| ≥ 2                 | 100 (88-100)         | 23 (17-31)           | 1.3 (1.2-1.4)  | 0                | 20 (14-27)   | 100 (90-100) |      | 29 | 0  | 119 | 36  | 184   |
| ≥ 3                 | 90 (73-98)           | 33 (26-41)           | 1.3 (1.1-1.6)  | 0.31 (0.11-0.94) | 20 (14-28)   | 94 (85-99)   |      | 26 | 3  | 104 | 51  | 184   |
| ≥ 4                 | 83 (64-94)           | 41 (34-50)           | 1.4 (1.1-1.7)  | 0.42 (0.18-0.94) | 21 (14-29)   | 93 (84-98)   |      | 24 | 5  | 91  | 64  | 184   |
| ≥ 5                 | 83 (64-94)           | 48 (40-56)           | 1.6 (1.3-2.0)  | 0.36 (0.16-0.82) | 23 (15-32)   | 94 (86-98)   |      | 24 | 5  | 81  | 74  | 184   |
| ≥ 6                 | 79 (60-92)           | 56 (48-64)           | 1.8 (1.4-2.3)  | 0.37 (0.18-0.76) | 25 (17-36)   | 94 (87-98)   |      | 23 | 6  | 68  | 87  | 184   |
| ≥ 7                 | 76 (57-90)           | 61 (53-68)           | 1.9 (1.5-2.6)  | 0.40 (0.21-0.77) | 27 (17-37)   | 93 (86-97)   |      | 22 | 7  | 61  | 94  | 184   |
| ≥ 8                 | 76 (57-90)           | 67 (59-74)           | 2.3 (1.7-3.1)  | 0.36 (0.19-0.69) | 30 (20-42)   | 94 (87-97)   |      | 22 | 7  | 51  | 104 | 184   |
| ≥ 9                 | 69 (49-85)           | 72 (64-79)           | 2.4 (1.7-3.5)  | 0.43 (0.25-0.75) | 31 (20-44)   | 93 (86-97)   |      | 20 | 9  | 44  | 111 | 184   |
| ≥ 10                | 66 (46-82)           | 76 (69-83)           | 2.7 (1.9-4.0)  | 0.45 (0.27-0.75) | 34 (22-48)   | 92 (86-96)   |      | 19 | 10 | 37  | 118 | 184   |
| ≥ 13                | 45 (26-64)           | 86 (79-91)           | 3.2 (1.8-5.5)  | 0.64 (0.46-0.90) | 37 (22-55)   | 89 (83-94)   |      | 13 | 16 | 22  | 133 | 184   |
| NIHSS               |                      |                      |                |                  |              |              | 0.76 |    |    |     |     |       |
| ≥ 2                 | 100 (88-100)         | 12 (08-19)           | 1.1 (1.1-1.2)  | 0                | 18 (12-24)   | 100 (82-100) |      | 29 | 0  | 136 | 19  | 184   |
| ≥ 3                 | 97 (82-100)          | 19 (13-26)           | 1.2 (1.1-1.3)  | 0.18 (0.03-1.3)  | 18 (12-25)   | 97 (83-100)  |      | 28 | 1  | 126 | 29  | 184   |
| ≥ 4                 | 90 (73-98)           | 30 (23-38)           | 1.3 (1.1-1.5)  | 0.35 (0.12-1.1)  | 19 (13-27)   | 94 (83-99)   |      | 26 | 3  | 109 | 46  | 184   |
| ≥ 5                 | 90 (73-98)           | 37 (29-45)           | 1.4 (1.2-1.7)  | 0.28 (0.10-0.84) | 21 (14-29)   | 95 (86-99)   |      | 26 | 3  | 98  | 57  | 184   |

|      |              |             |                |                  |            |              |      |    |     |     |     |
|------|--------------|-------------|----------------|------------------|------------|--------------|------|----|-----|-----|-----|
| ≥ 6  | 86 (68-96)   | 46 (38-54)  | 1.6 (1.3-2.0)  | 0.30 (0.12-0.76) | 23 (15-32) | 95 (87-99)   | 25   | 4  | 84  | 71  | 184 |
| ≥ 7  | 83 (64-94)   | 54 (46-62)  | 1.8 (1.4-2.3)  | 0.32 (0.14-0.72) | 26 (17-36) | 94 (88-98)   | 24   | 5  | 71  | 84  | 184 |
| ≥ 8  | 83 (64-94)   | 57 (49-65)  | 1.9 (1.5-2.5)  | 0.30 (0.14-0.68) | 26 (18-37) | 95 (88-98)   | 24   | 5  | 67  | 88  | 184 |
| ≥ 9  | 83 (64-94)   | 61 (53-68)  | 2.1 (1.6-2.7)  | 0.28 (0.13-0.64) | 28 (19-39) | 95 (89-98)   | 24   | 5  | 61  | 94  | 184 |
| ≥ 10 | 79 (60-92)   | 68 (60-76)  | 2.5 (1.9-3.4)  | 0.30 (0.15-0.62) | 32 (21-44) | 95 (89-98)   | 23   | 6  | 49  | 106 | 184 |
| ≥ 16 | 48 (29-68)   | 86 (79-91)  | 3.4 (2.0-5.8)  | 0.60 (0.42-0.86) | 39 (34-57) | 90 (84-94)   | 14   | 15 | 22  | 133 | 184 |
| PASS |              |             |                |                  |            |              | 0.73 |    |     |     |     |
| ≥ 1  | 93 (77-99)   | 25 (19-33)  | 1.2 (1.1-1.4)  | 0.27 (0.07-1.1)  | 19 (13-26) | 95 (84-99)   | 27   | 2  | 116 | 39  | 184 |
| ≥ 2  | 66 (46-82)   | 64 (56-71)  | 1.8 (1.3-2.5)  | 0.54 (0.32-0.90) | 25 (16-37) | 91 (84-96)   | 19   | 10 | 56  | 99  | 184 |
| = 3  | 48 (29-68)   | 91 (85-95)  | 5.3 (2.9-9.9)  | 0.57 (0.40-0.81) | 50 (31-69) | 90 (85-95)   | 14   | 15 | 14  | 141 | 184 |
| RACE |              |             |                |                  |            |              | 0.77 |    |     |     |     |
| ≥ 1  | 90 (73-98)   | 30 (23-38)  | 1.3 (1.1-1.5)  | 0.35 (0.12-1.1)  | 19 (13-27) | 94 (83-99)   | 26   | 3  | 109 | 46  | 184 |
| ≥ 2  | 86 (68-96)   | 47 (39-55)  | 1.6 (1.3-2.0)  | 0.29 (0.12-0.74) | 23 (16-33) | 95 (87-99)   | 25   | 4  | 82  | 73  | 184 |
| ≥ 3  | 83 (64-94)   | 64 (56-71)  | 2.3 (1.8-3.0)  | 0.27 (0.12-0.60) | 30 (20-41) | 95 (89-98)   | 24   | 5  | 56  | 99  | 184 |
| ≥ 4  | 72 (53-87)   | 69 (61-76)  | 2.3 (1.6-3.2)  | 0.40 (0.22-0.73) | 30 (20-43) | 93 (87-97)   | 21   | 8  | 48  | 107 | 184 |
| ≥ 5  | 59 (39-77)   | 81 (74-87)  | 3.0 (1.9-4.7)  | 0.51 (0.33-0.80) | 36 (23-52) | 91 (85-95)   | 17   | 12 | 30  | 125 | 184 |
| ≥ 6  | 52 (33-71)   | 87 (81-92)  | 4.0 (2.3-6.9)  | 0.55 (0.38-0.81) | 43 (26-61) | 91 (85-95)   | 15   | 14 | 20  | 135 | 184 |
| ≥ 7  | 41 (24-61)   | 94 (89-97)  | 6.4 (3.1-13.4) | 0.63 (0.46-0.85) | 55 (32-76) | 90 (84-94)   | 12   | 17 | 10  | 145 | 184 |
| ≥ 8  | 14 (04-32)   | 96 (92-99)  | 3.6 (1.1-11.8) | 0.90 (0.77-1.04) | 40 (12-74) | 86 (80-91)   | 4    | 25 | 6   | 149 | 184 |
| = 9  | 03 (01-18)   | 98 (94-100) | 1.8 (0.2-16.5) | 0.99 (0.19-1.06) | 25 (53-81) | 84 (78-89)   | 1    | 28 | 3   | 152 | 184 |
| SAVE |              |             |                |                  |            |              | 0.79 |    |     |     |     |
| ≥ 1  | 100 (88-100) | 17 (11-24)  | 1.2 (1.1-1.3)  | 0                | 18 (13-25) | 100 (87-100) | 29   | 0  | 129 | 26  | 184 |
| ≥ 2  | 86 (68-96)   | 57 (49-65)  | 2.0 (1.6-2.5)  | 0.24 (0.10-0.61) | 27 (18-37) | 96 (89-99)   | 25   | 4  | 67  | 88  | 184 |
| ≥ 3  | 62 (42-79)   | 81 (74-87)  | 3.3 (2.2-5.1)  | 0.47 (0.29-0.75) | 38 (25-54) | 92 (86-96)   | 18   | 11 | 29  | 126 | 184 |
| = 4  | 38 (21-58)   | 92 (86-96)  | 4.5 (2.3-9.1)  | 0.68 (0.51-0.91) | 46 (26-67) | 89 (83-93)   | 11   | 18 | 13  | 142 | 184 |
| VAN  |              |             |                |                  |            |              | 0.72 |    |     |     |     |
| +    | 83 (64-94)   | 62 (54-70)  | 2.2 (1.7-2.8)  | 0.28 (0.12-0.52) | 29 (20-40) | 95 (89-98)   | 24   | 5  | 59  | 96  | 184 |

\*NPV for thresholds with zero positive cases is 1-prevalence. Specificity and NPV CIs from [https://www.medcalc.org/calc/diagnostic\\_test.php](https://www.medcalc.org/calc/diagnostic_test.php)

**Supplemental Table 7.** Diagnostic statistics for the reference standard of either LVO stroke excluding M2s (ICA, M1, or basilar occlusions) or intracranial hemorrhage. Prevalence % (95% CI): 20.1 (15-27).

| LVO (excluding M2s) or intracranial hemorrhage scale threshold | Sensitivity (95% CI) | Specificity (95% CI) | PLR (95% CI)   | NLR (95% CI)     | PPV (95% CI) | NPV (95% CI) | AUC  | TP | FN | FP  | TN  | Total |
|----------------------------------------------------------------|----------------------|----------------------|----------------|------------------|--------------|--------------|------|----|----|-----|-----|-------|
| AAW                                                            |                      |                      |                |                  |              |              | 0.73 |    |    |     |     |       |
| +                                                              | 89 (75-97)           | 57 (49-65)           | 2.1 (1.7-2.6)  | 0.19 (0.07-0.48) | 34 (25-45)   | 96 (89-99)   |      | 33 | 4  | 63  | 84  | 184   |
| CPSS                                                           |                      |                      |                |                  |              |              | 0.77 |    |    |     |     |       |
| ≥ 1                                                            | 100 (91-100)         | 18 (12-25)           | 1.2 (1.1-1.3)  | 0                | 23 (17-31)   | 100 (87-100) |      | 37 | 0  | 121 | 26  | 184   |
| ≥ 2                                                            | 89 (75-97)           | 44 (36-53)           | 1.6 (1.3-1.9)  | 0.24 (0.10-0.63) | 29 (21-38)   | 94 (86-98)   |      | 33 | 4  | 82  | 65  | 184   |
| = 3                                                            | 70 (53-84)           | 77 (69-83)           | 3.0 (2.1-4.4)  | 0.39 (0.23-0.64) | 43 (31-57)   | 91 (85-96)   |      | 26 | 11 | 34  | 113 | 184   |
| C-STAT                                                         |                      |                      |                |                  |              |              | 0.71 |    |    |     |     |       |
| ≥ 1                                                            | 76 (59-88)           | 51 (43-59)           | 1.6 (1.2-2.0)  | 0.48 (0.27-0.86) | 28 (20-38)   | 89 (81-95)   |      | 28 | 9  | 72  | 75  | 184   |
| ≥ 2                                                            | 62 (45-78)           | 78 (70-84)           | 2.8 (1.9-4.1)  | 0.49 (0.32-0.74) | 41 (28-55)   | 89 (82-94)   |      | 23 | 14 | 33  | 114 | 184   |
| ≥ 3                                                            | 43 (27-61)           | 85 (78-90)           | 2.9 (1.7-4.9)  | 0.67 (0.50-0.89) | 42 (26-59)   | 86 (79-91)   |      | 16 | 21 | 22  | 125 | 184   |
| = 4                                                            | 27 (14-44)           | 94 (89-97)           | 4.4 (1.9-10.1) | 0.78 (0.64-0.95) | 53 (29-76)   | 84 (77-89)   |      | 10 | 27 | 9   | 138 | 184   |
| FAST-ED                                                        |                      |                      |                |                  |              |              | 0.78 |    |    |     |     |       |
| ≥ 1                                                            | 100 (91-100)         | 27 (20-35)           | 1.4 (1.2-1.5)  | 0                | 26 (19-34)   | 100 (91-100) |      | 37 | 0  | 107 | 40  | 184   |
| ≥ 2                                                            | 81 (65-92)           | 49 (41-57)           | 1.6 (1.3-2.0)  | 0                | 29 (20-38)   | 91 (83-96)   |      | 30 | 7  | 75  | 72  | 184   |
| ≥ 3                                                            | 73 (56-86)           | 67 (59-75)           | 2.3 (1.7-3.0)  | 0.40 (0.23-0.69) | 36 (25-48)   | 91 (84-96)   |      | 27 | 10 | 48  | 99  | 184   |
| ≥ 4                                                            | 70 (53-84)           | 80 (73-86)           | 3.6 (2.4-5.3)  | 0.37 (0.22-0.61) | 47 (34-61)   | 92 (85-96)   |      | 26 | 11 | 29  | 118 | 184   |
| ≥ 5                                                            | 51 (34-68)           | 88 (82-93)           | 4.4 (2.6-7.7)  | 0.55 (0.39-0.77) | 53 (36-70)   | 88 (82-93)   |      | 19 | 18 | 17  | 130 | 184   |
| ≥ 6                                                            | 22 (10-38)           | 95 (90-98)           | 4.5 (1.8-11.7) | 0.82 (0.69-0.98) | 53 (27-79)   | 83 (76-88)   |      | 8  | 29 | 7   | 140 | 184   |
| ≥ 7                                                            | 08 (02-22)           | 98 (94-100)          | 4.0 (0.8-19.0) | 0.94 (0.85-1.04) | 50 (11-88)   | 81 (74-86)   |      | 3  | 34 | 3   | 144 | 184   |
| ≥ 8                                                            | 0                    | 100 (98-100)*        | -              | 1.0              | -            | 80 (80-80)*  |      | 0  | 37 | 0   | 147 | 184   |
| = 9                                                            | 0                    | 100 (98-100)*        | -              | 1.0              | -            | 80 (80-80)*  |      | 0  | 37 | 0   | 147 | 184   |
| G-FAST                                                         |                      |                      |                |                  |              |              | 0.77 |    |    |     |     |       |
| ≥ 1                                                            | 100 (91-100)         | 16 (11-23)           | 1.2 (1.1-1.3)  | 0                | 23 (17-30)   | 100 (86-100) |      | 37 | 0  | 123 | 24  | 184   |
| ≥ 2                                                            | 92 (78-98)           | 40 (32-48)           | 1.5 (1.3-1.8)  | 0.21 (0.07-0.62) | 28 (20-36)   | 95 (86-99)   |      | 34 | 3  | 89  | 58  | 184   |
| ≥ 3                                                            | 78 (62-90)           | 67 (58-74)           | 2.4 (1.8-3.1)  | 0.32 (0.17-0.61) | 38 (27-49)   | 93 (86-97)   |      | 29 | 8  | 49  | 98  | 184   |
| = 4                                                            | 41 (25-58)           | 89 (83-94)           | 3.7 (2.0-6.8)  | 0.67 (0.52-0.88) | 48 (30-67)   | 86 (79-91)   |      | 15 | 22 | 16  | 131 | 184   |
| mNIHSS                                                         |                      |                      |                |                  |              |              | 0.72 |    |    |     |     |       |
| ≥ 2                                                            | 95 (82-99)           | 23 (17-31)           | 1.2 (1.1-1.4)  | 0.23 (0.06-0.93) | 24 (17-31)   | 94 (81-99)   |      | 35 | 2  | 113 | 34  | 184   |
| ≥ 3                                                            | 89 (75-97)           | 34 (26-42)           | 1.4 (1.2-1.6)  | 0.32 (0.12-0.82) | 25 (18-34)   | 93 (82-98)   |      | 33 | 4  | 97  | 50  | 184   |
| ≥ 4                                                            | 81 (65-92)           | 42 (34-51)           | 1.4 (1.1-1.7)  | 0.45 (0.22-0.90) | 26 (18-35)   | 90 (80-96)   |      | 30 | 7  | 85  | 62  | 184   |
| ≥ 5                                                            | 81 (65-92)           | 49 (41-57)           | 1.6 (1.3-2.0)  | 0.39 (0.19-0.77) | 29 (20-38)   | 91 (83-96)   |      | 30 | 7  | 75  | 72  | 184   |
| ≥ 6                                                            | 76 (59-88)           | 57 (49-65)           | 1.8 (1.4-2.3)  | 0.43 (0.24-0.76) | 31 (22-41)   | 90 (82-96)   |      | 28 | 9  | 63  | 84  | 184   |
| ≥ 7                                                            | 68 (50-82)           | 61 (52-69)           | 1.7 (1.3-2.3)  | 0.54 (0.33-0.87) | 30 (21-41)   | 88 (80-94)   |      | 25 | 12 | 58  | 89  | 184   |
| ≥ 8                                                            | 68 (50-82)           | 67 (59-75)           | 2.1 (1.5-2.9)  | 0.48 (0.30-0.78) | 34 (24-46)   | 89 (82-94)   |      | 25 | 12 | 48  | 99  | 184   |
| ≥ 9                                                            | 65 (48-80)           | 73 (65-80)           | 2.4 (1.7-3.4)  | 0.48 (0.31-0.76) | 38 (26-51)   | 89 (82-94)   |      | 24 | 13 | 40  | 107 | 184   |
| ≥ 10                                                           | 62 (45-78)           | 78 (70-84)           | 2.8 (1.9-4.1)  | 0.49 (0.32-0.74) | 41 (28-55)   | 89 (82-94)   |      | 23 | 14 | 33  | 114 | 184   |
| ≥ 13                                                           | 41 (25-58)           | 86 (80-92)           | 3.0 (1.7-5.2)  | 0.69 (0.52-0.91) | 43 (26-61)   | 85 (79-91)   |      | 15 | 22 | 20  | 127 | 184   |
| NIHSS                                                          |                      |                      |                |                  |              |              | 0.75 |    |    |     |     |       |
| ≥ 2                                                            | 100 (91-100)         | 13 (8-19)            | 1.2 (1.1-1.2)  | 0                | 22 (16-30)   | 100 (82-100) |      | 37 | 0  | 128 | 19  | 184   |

|      |              |             |                |                  |            |              |      |    |     |     |     |
|------|--------------|-------------|----------------|------------------|------------|--------------|------|----|-----|-----|-----|
| ≥ 3  | 100 (91-100) | 20 (14-28)  | 1.3 (1.2-1.4)  | 0                | 24 (18-32) | 100 (88-100) | 37   | 0  | 117 | 30  | 184 |
| ≥ 4  | 95 (82-99)   | 32 (25-40)  | 1.4 (1.2-1.6)  | 0.17 (0.04-0.66) | 26 (19-34) | 96 (86-100)  | 35   | 2  | 100 | 47  | 184 |
| ≥ 5  | 89 (75-97)   | 38 (30-47)  | 1.4 (1.2-1.7)  | 0.28 (0.11-0.73) | 27 (19-35) | 93 (84-98)   | 33   | 4  | 91  | 56  | 184 |
| ≥ 6  | 84 (68-94)   | 47 (39-55)  | 1.6 (1.3-1.9)  | 0.35 (0.16-0.73) | 28 (20-38) | 92 (83-97)   | 31   | 6  | 78  | 69  | 184 |
| ≥ 7  | 78 (62-90)   | 55 (47-63)  | 1.8 (1.4-2.2)  | 0.39 (0.21-0.74) | 31 (22-41) | 91 (83-96)   | 29   | 8  | 66  | 81  | 184 |
| ≥ 8  | 78 (62-90)   | 58 (49-66)  | 1.9 (1.4-2.4)  | 0.37 (0.20-0.70) | 32 (23-43) | 91 (84-96)   | 29   | 8  | 62  | 85  | 184 |
| ≥ 9  | 73 (56-86)   | 61 (52-69)  | 1.9 (1.4-2.5)  | 0.45 (0.26-0.77) | 32 (22-43) | 90 (82-95)   | 27   | 10 | 58  | 89  | 184 |
| ≥ 10 | 68 (50-82)   | 68 (60-76)  | 2.1 (1.5-2.9)  | 0.48 (0.30-0.77) | 35 (24-47) | 89 (82-94)   | 25   | 12 | 47  | 100 | 184 |
| ≥ 16 | 43 (27-61)   | 86 (80-92)  | 3.2 (1.8-5.5)  | 0.66 (0.49-0.88) | 44 (28-62) | 86 (79-91)   | 16   | 21 | 20  | 127 | 184 |
| PASS |              |             |                |                  |            |              | 0.73 |    |     |     |     |
| ≥ 1  | 97 (86-100)  | 27 (20-35)  | 1.3 (1.2-1.5)  | 0.10 (0.01-0.70) | 25 (18-33) | 98 (87-100)  | 36   | 1  | 107 | 40  | 184 |
| ≥ 2  | 65 (48-80)   | 65 (57-73)  | 1.9 (1.4-2.6)  | 0.54 (0.34-0.85) | 32 (22-44) | 88 (81-94)   | 24   | 13 | 51  | 96  | 184 |
| = 3  | 41 (25-58)   | 91 (85-95)  | 4.6 (2.4-8.8)  | 0.65 (0.50-0.86) | 54 (34-73) | 86 (79-91)   | 15   | 22 | 13  | 134 | 184 |
| RACE |              |             |                |                  |            |              | 0.78 |    |     |     |     |
| ≥ 1  | 92 (78-98)   | 31 (24-40)  | 1.3 (1.2-1.6)  | 0.26 (0.09-0.79) | 25 (18-33) | 94 (83-99)   | 34   | 3  | 101 | 46  | 184 |
| ≥ 2  | 84 (68-94)   | 48 (40-57)  | 1.6 (1.3-2.0)  | 0.34 (0.16-0.71) | 29 (21-39) | 92 (84-97)   | 31   | 6  | 76  | 71  | 184 |
| ≥ 3  | 78 (62-90)   | 65 (57-73)  | 2.3 (1.7-3.0)  | 0.33 (0.18-0.62) | 36 (26-48) | 92 (85-96)   | 29   | 8  | 51  | 96  | 184 |
| ≥ 4  | 76 (59-88)   | 72 (64-79)  | 2.7 (2.0-3.7)  | 0.34 (0.19-0.60) | 41 (29-53) | 92 (86-96)   | 28   | 9  | 41  | 106 | 184 |
| ≥ 5  | 62 (45-76)   | 84 (77-89)  | 3.8 (2.4-5.9)  | 0.45 (0.30-0.69) | 49 (34-64) | 90 (83-94)   | 23   | 14 | 24  | 123 | 184 |
| ≥ 6  | 49 (32-66)   | 88 (82-93)  | 4.2 (2.4-7.3)  | 0.58 (0.42-0.80) | 51 (34-69) | 87 (81-92)   | 18   | 19 | 17  | 130 | 184 |
| ≥ 7  | 35 (20-53)   | 94 (89-97)  | 5.7 (2.6-12.4) | 0.69 (0.54-0.88) | 59 (36-79) | 85 (79-90)   | 13   | 24 | 9   | 138 | 184 |
| ≥ 8  | 14 (5-29)    | 97 (92-99)  | 4.0 (1.2-13.0) | 0.90 (0.79-1.02) | 50 (19-81) | 82 (75-88)   | 5    | 32 | 5   | 142 | 184 |
| = 9  | 8 (2-22)     | 99 (96-100) | 11.9 (1.3-111) | 0.93 (0.84-1.02) | 75 (19-99) | 81 (75-87)   | 3    | 34 | 1   | 146 | 184 |
| SAVE |              |             |                |                  |            |              | 0.76 |    |     |     |     |
| ≥ 1  | 100 (91-100) | 18 (12-25)  | 1.2 (1.1-1.3)  | 0                | 23 (17-31) | 100 (87-100) | 37   | 0  | 121 | 26  | 184 |
| ≥ 2  | 81 (65-92)   | 58 (49-66)  | 1.9 (1.5-2.5)  | 0.33 (0.17-0.65) | 33 (23-43) | 92 (85-97)   | 30   | 7  | 62  | 85  | 184 |
| ≥ 3  | 57 (40-73)   | 82 (75-88)  | 3.2 (2.1-5.0)  | 0.53 (0.36-0.77) | 45 (30-60) | 88 (82-93)   | 21   | 16 | 26  | 121 | 184 |
| = 4  | 32 (18-50)   | 92 (86-96)  | 4.0 (1.9-8.1)  | 0.74 (0.59-0.92) | 50 (29-71) | 84 (78-90)   | 12   | 25 | 12  | 135 | 184 |
| VAN  |              |             |                |                  |            |              | 0.69 |    |     |     |     |
| +    | 76 (59-99)   | 63 (54-70)  | 2.0 (1.5-2.7)  | 0.39 (0.22-0.70) | 34 (24-45) | 91 (84-96)   | 28   | 9  | 55  | 92  | 184 |

\*NPV for thresholds with zero positive cases is 1-prevalence. Specificity and NPV CIs from [https://www.medcalc.org/calc/diagnostic\\_test.php](https://www.medcalc.org/calc/diagnostic_test.php)

**Supplemental Table 8.** Diagnostic statistics for the reference standard of either LVO stroke (ICA, M1, M2, or basilar occlusions) or intracranial hemorrhage  
Prevalence % (95% CI): 26.1 (20-33).

| LVO or intracranial hemorrhage scale threshold | Sensitivity (95% CI) | Specificity (95% CI) | PLR (95% CI)   | NLR (95% CI)     | PPV (95% CI) | NPV (95% CI) | AUC  | TP | FN | FP  | TN  | Total |
|------------------------------------------------|----------------------|----------------------|----------------|------------------|--------------|--------------|------|----|----|-----|-----|-------|
| AAW                                            |                      |                      |                |                  |              |              | 0.70 |    |    |     |     |       |
| +                                              | 81 (67-91)           | 58 (49-67)           | 1.9 (1.5-2.5)  | 0.32 (0.18-0.59) | 41 (31-51)   | 90 (82-95)   |      | 39 | 9  | 57  | 79  | 184   |
| CPSS                                           |                      |                      |                |                  |              |              | 0.75 |    |    |     |     |       |
| ≥ 1                                            | 98 (89-100)          | 18 (12-26)           | 1.2 (1.1-1.3)  | 0.11 (0.02-0.81) | 30 (23-38)   | 96 (80-100)  |      | 47 | 1  | 111 | 25  | 184   |
| ≥ 2                                            | 88 (75-95)           | 46 (38-55)           | 1.6 (1.4-2.0)  | 0.27 (0.13-0.58) | 37 (28-46)   | 91 (82-97)   |      | 42 | 6  | 73  | 63  | 184   |
| = 3                                            | 63 (47-76)           | 78 (70-85)           | 2.8 (1.9-4.2)  | 0.48 (0.33-0.70) | 50 (37-63)   | 86 (78-91)   |      | 30 | 18 | 30  | 106 | 184   |
| C-STAT                                         |                      |                      |                |                  |              |              | 0.69 |    |    |     |     |       |
| ≥ 1                                            | 71 (56-83)           | 52 (43-60)           | 1.5 (1.1-1.9)  | 0.57 (0.35-0.91) | 34 (25-44)   | 83 (74-91)   |      | 34 | 14 | 66  | 70  | 184   |
| ≥ 2                                            | 58 (43-72)           | 79 (72-86)           | 2.8 (1.9-4.3)  | 0.53 (0.38-0.74) | 50 (36-64)   | 84 (77-90)   |      | 28 | 20 | 28  | 108 | 184   |
| ≥ 3                                            | 44 (30-59)           | 88 (81-93)           | 3.5 (2.0-6.1)  | 0.64 (0.50-0.83) | 55 (38-71)   | 82 (74-87)   |      | 21 | 27 | 17  | 119 | 184   |
| = 4                                            | 25 (14-40)           | 95 (90-98)           | 4.9 (2.0-11.6) | 0.79 (0.67-0.94) | 63 (38-84)   | 78 (71-84)   |      | 12 | 36 | 7   | 129 | 184   |
| FAST-ED                                        |                      |                      |                |                  |              |              | 0.79 |    |    |     |     |       |
| ≥ 1                                            | 98 (89-100)          | 29 (21-37)           | 1.4 (1.2-1.5)  | 0.07 (0.01-0.51) | 33 (25-41)   | 98 (87-100)  |      | 47 | 1  | 97  | 39  | 184   |
| ≥ 2                                            | 81 (68-91)           | 52 (43-60)           | 1.7 (1.3-2.1)  | 0.36 (0.20-0.67) | 37 (28-47)   | 89 (80-95)   |      | 39 | 9  | 66  | 70  | 184   |
| ≥ 3                                            | 73 (58-85)           | 71 (62-78)           | 2.5 (1.8-3.4)  | 0.38 (0.24-0.62) | 47 (35-59)   | 88 (81-94)   |      | 35 | 13 | 40  | 96  | 184   |
| ≥ 4                                            | 68 (52-80)           | 83 (76-89)           | 3.9 (2.6-6.0)  | 0.40 (0.27-0.60) | 58 (44-71)   | 88 (81-93)   |      | 32 | 16 | 23  | 113 | 184   |
| ≥ 5                                            | 48 (33-63)           | 90 (84-95)           | 5.0 (2.8-9.1)  | 0.58 (0.44-0.76) | 64 (46-79)   | 83 (76-89)   |      | 23 | 25 | 13  | 123 | 184   |
| ≥ 6                                            | 21 (11-35)           | 97 (92-99)           | 5.7 (2.0-15.7) | 0.82 (0.71-0.95) | 67 (38-88)   | 78 (71-84)   |      | 10 | 38 | 5   | 131 | 184   |
| ≥ 7                                            | 10 (03-23)           | 99 (96-100)          | 14 (1.7-118.0) | 0.90 (0.82-1.0)  | 83 (36-100)  | 76 (69-82)   |      | 5  | 43 | 1   | 135 | 184   |
| ≥ 8                                            | 0                    | 100 (97-100)*        | -              | 1.0              | -            | 74 (74-74)*  |      | 0  | 48 | 0   | 136 | 184   |
| = 9                                            | 0                    | 100 (97-100)*        | -              | 1.0              | -            | 74 (74-74)*  |      | 0  | 48 | 0   | 136 | 184   |
| G-FAST                                         |                      |                      |                |                  |              |              | 0.76 |    |    |     |     |       |
| ≥ 1                                            | 98 (89-100)          | 17 (11-24)           | 1.2 (1.1-1.3)  | 0.12 (0.02-0.89) | 29 (22-37)   | 96 (79-100)  |      | 47 | 1  | 113 | 23  | 184   |
| ≥ 2                                            | 90 (77-97)           | 41 (33-50)           | 1.5 (1.3-1.8)  | 0.25 (0.11-0.59) | 35 (27-44)   | 92 (82-97)   |      | 43 | 5  | 80  | 56  | 184   |
| ≥ 3                                            | 75 (60-86)           | 69 (61-77)           | 2.4 (1.8-3.3)  | 0.36 (0.22-0.60) | 46 (35-58)   | 89 (81-94)   |      | 36 | 12 | 42  | 94  | 184   |
| = 4                                            | 38 (24-53)           | 90 (84-95)           | 3.9 (2.1-7.4)  | 0.69 (0.55-0.87) | 58 (39-76)   | 80 (73-86)   |      | 18 | 30 | 13  | 123 | 184   |
| mNIHSS                                         |                      |                      |                |                  |              |              | 0.71 |    |    |     |     |       |
| ≥ 2                                            | 96 (86-100)          | 25 (18-33)           | 1.3 (1.1-1.4)  | 0.17 (0.04-0.67) | 31 (24-39)   | 94 (81-99)   |      | 46 | 2  | 102 | 34  | 184   |
| ≥ 3                                            | 88 (75-95)           | 35 (27-44)           | 1.4 (1.2-1.6)  | 0.35 (0.16-0.77) | 32 (24-41)   | 89 (77-96)   |      | 42 | 6  | 88  | 48  | 184   |
| ≥ 4                                            | 77 (62-88)           | 43 (34-51)           | 1.3 (1.1-1.7)  | 0.54 (0.31-0.94) | 32 (24-42)   | 84 (73-92)   |      | 37 | 11 | 78  | 58  | 184   |
| ≥ 5                                            | 77 (63-88)           | 50 (51-59)           | 1.5 (1.2-1.9)  | 0.46 (0.27-0.79) | 35 (26-45)   | 86 (77-93)   |      | 37 | 11 | 68  | 68  | 184   |
| ≥ 6                                            | 71 (56-83)           | 58 (49-67)           | 1.7 (1.3-2.2)  | 0.50 (0.32-0.80) | 37 (27-48)   | 85 (76-92)   |      | 34 | 14 | 57  | 79  | 184   |
| ≥ 7                                            | 65 (50-78)           | 62 (53-70)           | 1.7 (1.2-2.3)  | 0.57 (0.38-0.86) | 37 (27-49)   | 83 (74-90)   |      | 31 | 17 | 52  | 84  | 184   |
| ≥ 8                                            | 65 (50-78)           | 69 (61-77)           | 2.1 (1.5-2.9)  | 0.51 (0.34-0.76) | 43 (31-55)   | 85 (77-91)   |      | 31 | 17 | 42  | 94  | 184   |
| ≥ 9                                            | 58 (43-72)           | 74 (65-80)           | 2.2 (1.5-3.2)  | 0.57 (0.40-0.80) | 44 (31-57)   | 83 (75-90)   |      | 28 | 20 | 36  | 100 | 184   |
| ≥ 10                                           | 56 (41-71)           | 79 (71-85)           | 2.6 (1.8-4.0)  | 0.57 (0.40-0.78) | 48 (35-62)   | 84 (76-90)   |      | 27 | 21 | 29  | 107 | 184   |
| ≥ 13                                           | 38 (24-53)           | 88 (80-93)           | 3.0 (1.7-5.3)  | 0.71 (0.57-0.90) | 51 (34-69)   | 80 (73-86)   |      | 18 | 30 | 17  | 119 | 184   |
| NIHSS                                          |                      |                      |                |                  |              |              |      |    |    |     |     |       |
| ≥ 2                                            | 100 (93-100)         | 14 (09-21)           | 1.2 (1.1-1.2)  | 0                | 29 (22-37)   | 100 (82-100) |      | 48 | 0  | 117 | 19  | 184   |
| ≥ 3                                            | 98 (89-100)          | 21 (15-29)           | 1.2 (1.1-1.4)  | 0.10 (0.01-0.70) | 31 (23-38)   | 97 (83-100)  |      | 47 | 1  | 107 | 29  | 184   |

|      |              |             |                |                  |            |              |      |    |     |     |     |
|------|--------------|-------------|----------------|------------------|------------|--------------|------|----|-----|-----|-----|
| ≥ 4  | 92 (80-98)   | 33 (25-42)  | 1.4 (1.2-1.6)  | 0.25 (0.10-0.66) | 33 (25-41) | 92 (80-98)   | 44   | 4  | 91  | 45  | 184 |
| ≥ 5  | 88 (75-95)   | 40 (31-48)  | 1.5 (1.2-1.7)  | 0.32 (0.15-0.68) | 34 (26-43) | 90 (80-96)   | 42   | 6  | 82  | 54  | 184 |
| ≥ 6  | 81 (67-91)   | 49 (40-57)  | 1.6 (1.3-2.0)  | 0.39 (0.21-0.71) | 36 (27-46) | 88 (78-94)   | 39   | 9  | 70  | 66  | 184 |
| ≥ 7  | 75 (60-86)   | 57 (48-65)  | 1.7 (1.3-2.2)  | 0.44 (0.27-0.74) | 38 (28-48) | 87 (77-93)   | 36   | 12 | 59  | 77  | 184 |
| ≥ 8  | 75 (60-86)   | 60 (51-68)  | 1.9 (1.4-2.4)  | 0.42 (0.25-0.70) | 40 (30-50) | 40 (30-50)   | 36   | 12 | 55  | 81  | 184 |
| ≥ 9  | 71 (56-83)   | 63 (54-71)  | 1.9 (1.4-2.5)  | 0.47 (0.30-0.74) | 40 (30-51) | 86 (77-92)   | 34   | 14 | 51  | 85  | 184 |
| ≥ 10 | 65 (50-78)   | 70 (61-77)  | 2.1 (1.5-3.0)  | 0.51 (0.34-0.76) | 43 (31-55) | 85 (77-91)   | 31   | 17 | 41  | 95  | 184 |
| ≥ 14 | 54 (39-69)   | 84 (77-90)  | 3.4 (2.1-5.3)  | 0.55 (0.40-0.75) | 54 (39-69) | 84 (77-90)   | 26   | 22 | 22  | 114 | 184 |
| ≥ 15 | 46 (31-61)   | 86 (79-91)  | 3.3 (2.0-5.5)  | 0.63 (0.48-0.82) | 54 (37-69) | 82 (75-88)   | 22   | 26 | 19  | 117 | 184 |
| PASS |              |             |                |                  |            |              | 0.72 |    |     |     |     |
| ≥ 1  | 94 (83-99)   | 28 (21-36)  | 1.3 (1.2-1.5)  | 0.22 (0.07-0.69) | 32 (34-40) | 93 (80-99)   | 45   | 3  | 98  | 38  | 184 |
| ≥ 2  | 63 (48-76)   | 67 (58-75)  | 1.9 (1.4-2.6)  | 0.56 (0.38-0.82) | 40 (29-52) | 84 (75-90)   | 30   | 18 | 45  | 91  | 184 |
| = 3  | 40 (26-55)   | 93 (88-97)  | 6.0 (2.9-12.3) | 0.65 (0.51-0.82) | 68 (48-84) | 81 (74-87)   | 19   | 29 | 9   | 127 | 184 |
| RACE |              |             |                |                  |            |              | 0.75 |    |     |     |     |
| ≥ 1  | 90 (77-97)   | 32 (25-41)  | 1.3 (1.1-1.5)  | 0.32 (0.14-0.76) | 32 (24-40) | 90 (78-97)   | 43   | 5  | 92  | 44  | 184 |
| ≥ 2  | 81 (67-91)   | 50 (41-59)  | 1.6 (1.3-2.0)  | 0.38 (0.20-0.69) | 36 (27-46) | 88 (79-95)   | 39   | 9  | 68  | 68  | 184 |
| ≥ 3  | 75 (60-86)   | 67 (59-75)  | 2.3 (1.7-3.1)  | 0.37 (0.22-0.61) | 45 (34-57) | 89 (81-94)   | 36   | 12 | 44  | 92  | 184 |
| ≥ 4  | 67 (52-80)   | 73 (65-80)  | 2.5 (1.7-3.4)  | 0.46 (0.30-0.69) | 46 (34-59) | 86 (78-92)   | 32   | 16 | 37  | 99  | 184 |
| ≥ 5  | 52 (37-67)   | 84 (77-90)  | 3.2 (2.0-5.2)  | 0.57 (0.42-0.78) | 53 (38-68) | 83 (76-89)   | 25   | 23 | 22  | 114 | 184 |
| ≥ 6  | 42 (28-57)   | 89 (82-94)  | 3.8 (2.1-6.8)  | 0.66 (0.51-0.84) | 57 (39-74) | 81 (74-87)   | 20   | 28 | 15  | 121 | 184 |
| ≥ 7  | 31 (19-46)   | 95 (90-98)  | 6.1 (2.6-14.0) | 0.73 (0.60-0.88) | 68 (45-86) | 80 (73-86)   | 15   | 33 | 7   | 129 | 184 |
| ≥ 8  | 13 (05-25)   | 97 (93-99)  | 4.3 (1.3-14.4) | 0.90 (0.81-1.0)  | 60 (26-88) | 76 (69-82)   | 6    | 42 | 4   | 132 | 184 |
| = 9  | 06 (01-17)   | 99 (96-100) | 8.5 (0.91-80)  | 0.94 (0.88-1.0)  | 75 (19-99) | 75 (68-81)   | 3    | 45 | 1   | 135 | 184 |
| SAVE |              |             |                |                  |            |              | 0.77 |    |     |     |     |
| ≥ 1  | 100 (93-100) | 19 (13-27)  | 1.2 (1.1-1.3)  | 0                | 30 (23-38) | 100 (87-100) | 48   | 0  | 110 | 26  | 184 |
| ≥ 2  | 79 (65-90)   | 60 (52-69)  | 2.0 (1.6-2.6)  | 0.35 (0.20-0.61) | 41 (31-52) | 89 (81-95)   | 38   | 10 | 54  | 82  | 184 |
| ≥ 3  | 54 (39-69)   | 85 (77-90)  | 3.5 (2.2-5.6)  | 0.54 (0.40-0.74) | 55 (40-70) | 84 (77-90)   | 26   | 22 | 21  | 115 | 184 |
| = 4  | 31 (19-46)   | 93 (88-97)  | 4.7 (2.2-10.1) | 0.74 (0.61-0.90) | 63 (41-81) | 79 (72-85)   | 15   | 33 | 9   | 127 | 184 |
| VAN  |              |             |                |                  |            |              | 0.69 |    |     |     |     |
| +    | 73 (58-85)   | 65 (56-73)  | 2.1 (1.6-2.8)  | 0.42 (0.26-0.68) | 42 (31-54) | 87 (79-93)   | 35   | 13 | 48  | 88  | 184 |

\*NPV for thresholds with zero positive cases is 1-prevalence. Specificity and NPV CIs from [https://www.medcalc.org/calc/diagnostic\\_test.php](https://www.medcalc.org/calc/diagnostic_test.php)



**Supplemental Figure 1.** Classification counts by scale threshold for the reference standard of LVO stroke excluding M2s (ICA, M1, or basilar occlusions).

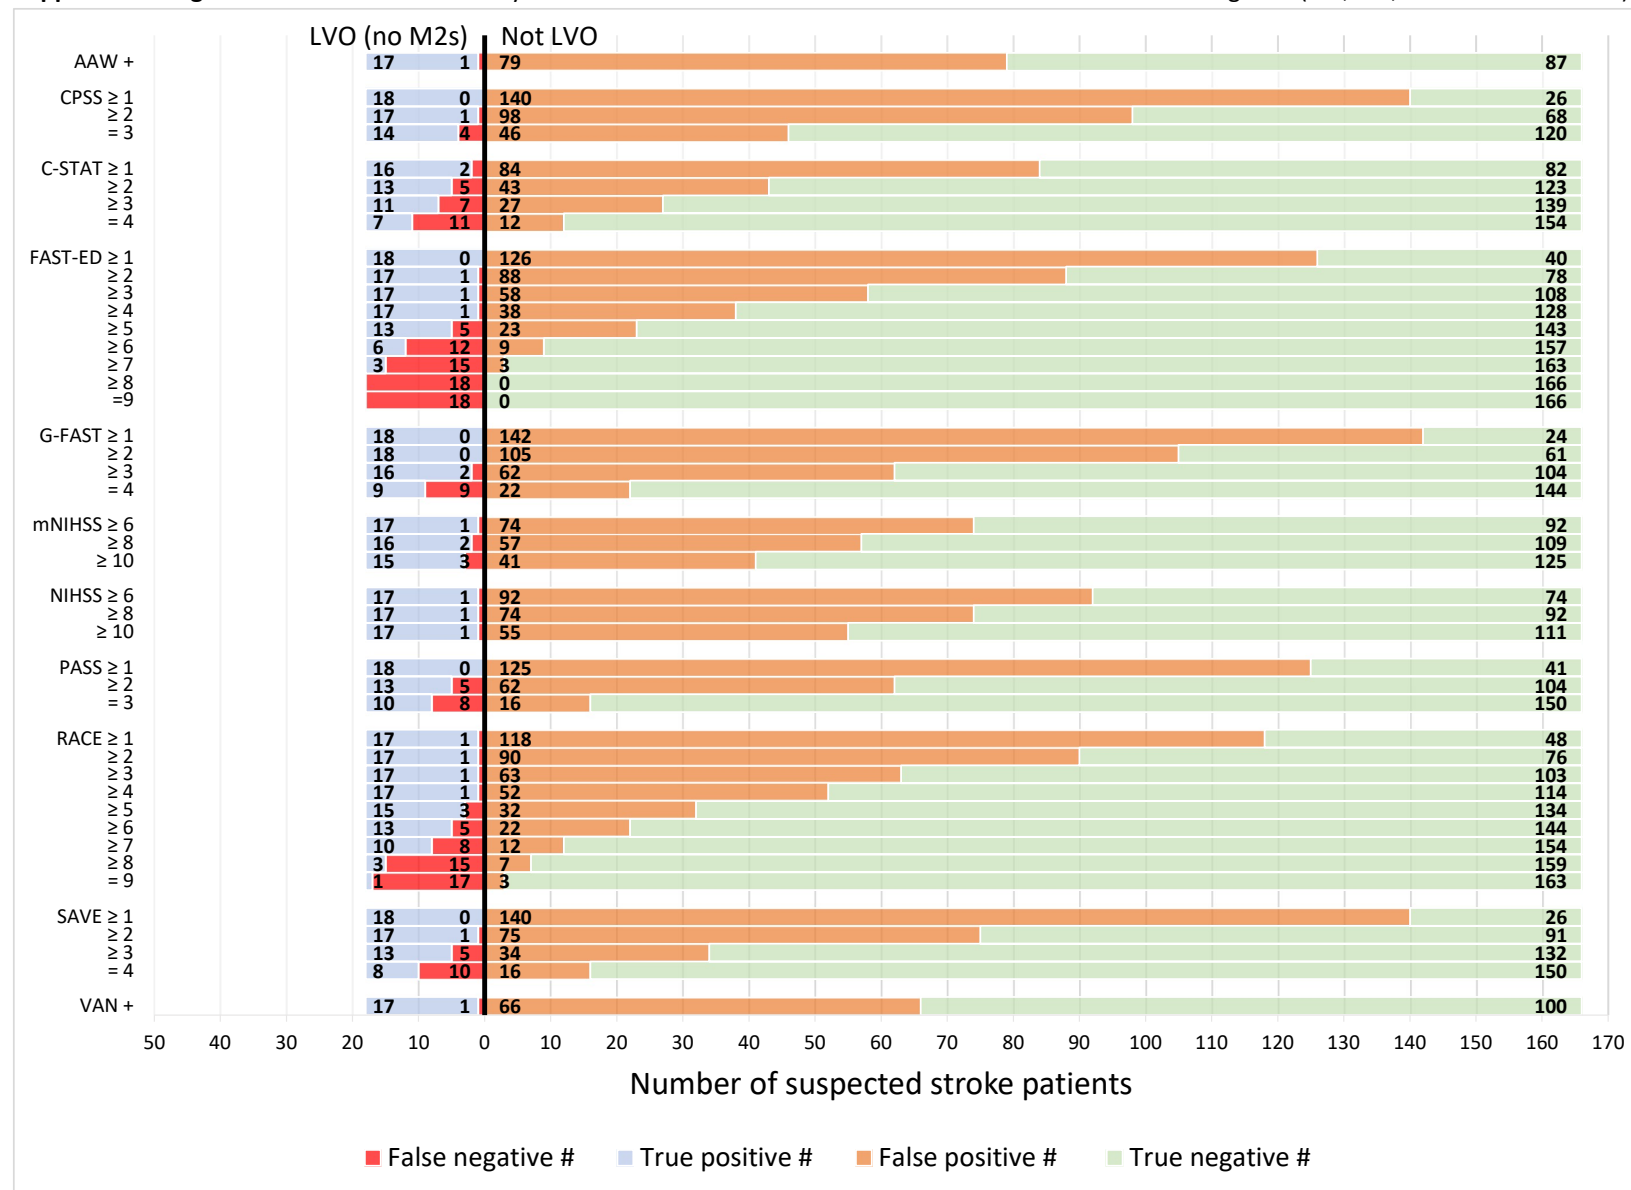

**Supplemental Figure 2.** Classification counts by scale threshold for the reference standard of LVO stroke (ICA, M1, M2, or basilar occlusions).

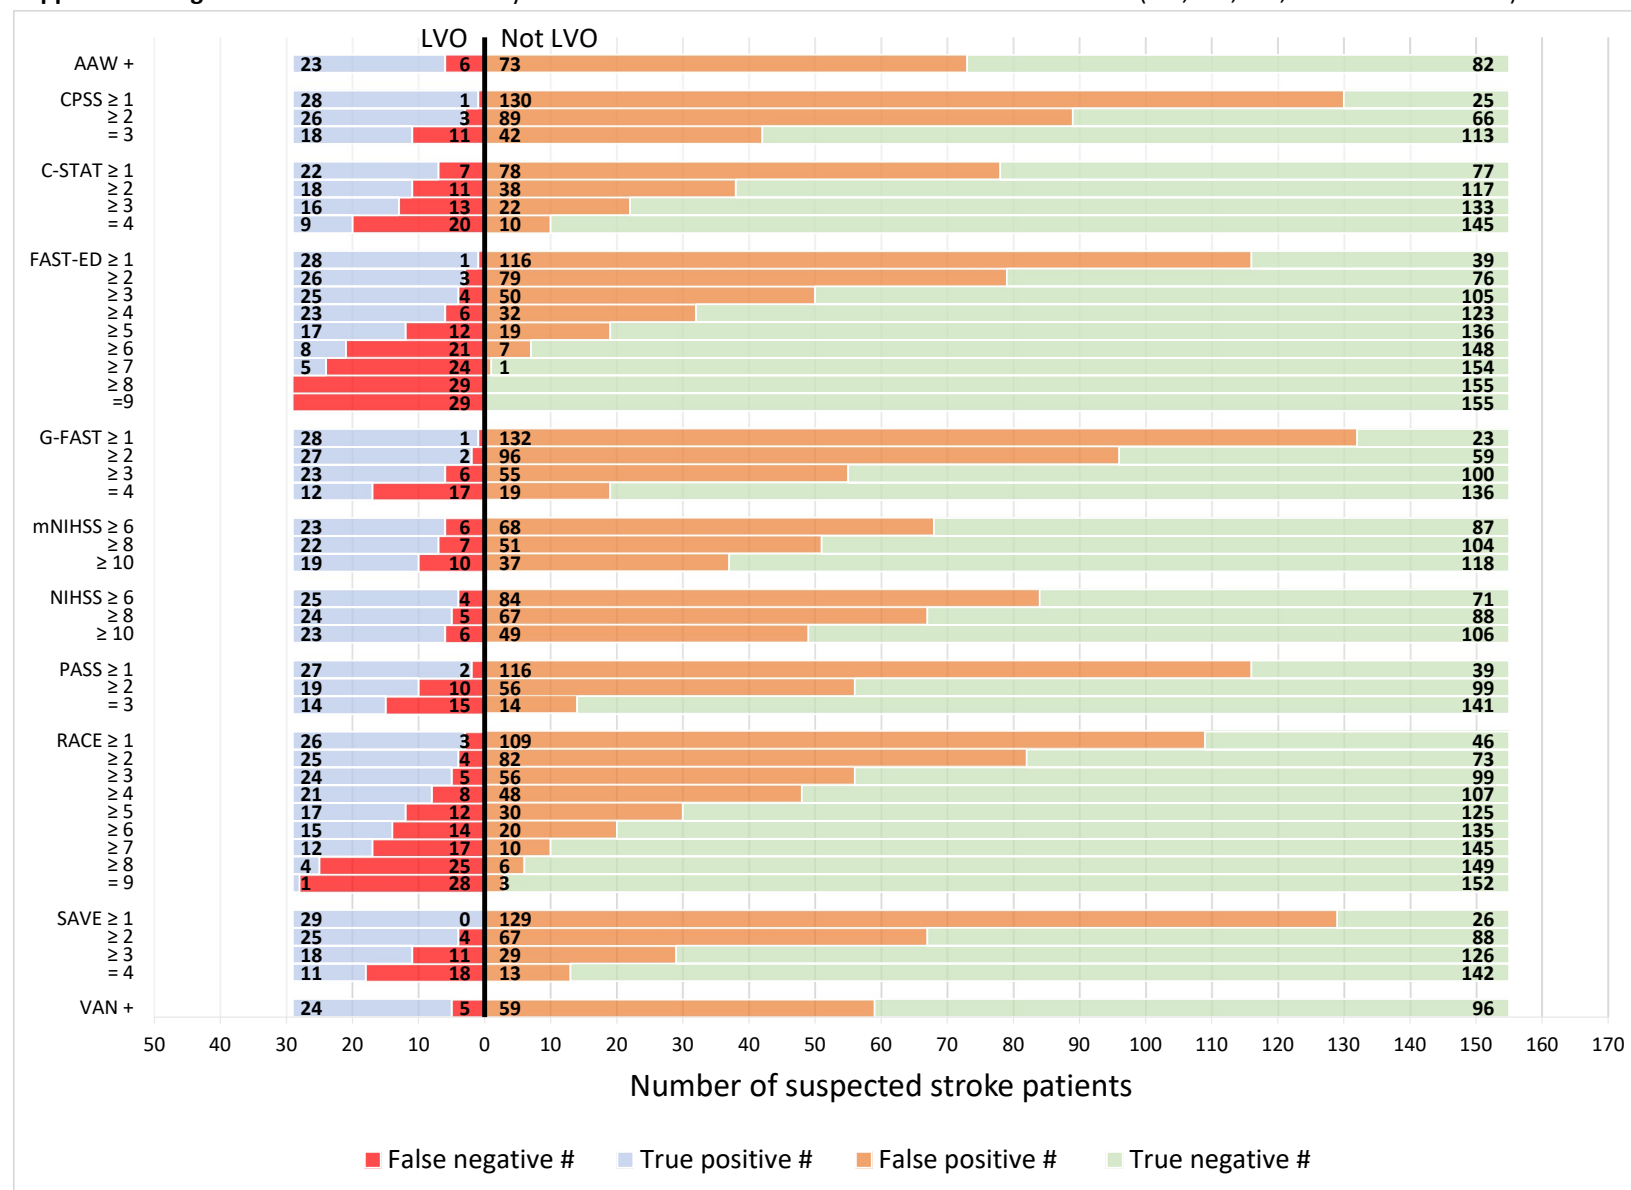

**Supplemental Figure 3.** Classification counts by scale threshold for the reference standard of LVO stroke excluding M2s (ICA, M1, or basilar occlusions) or intracranial hemorrhages.

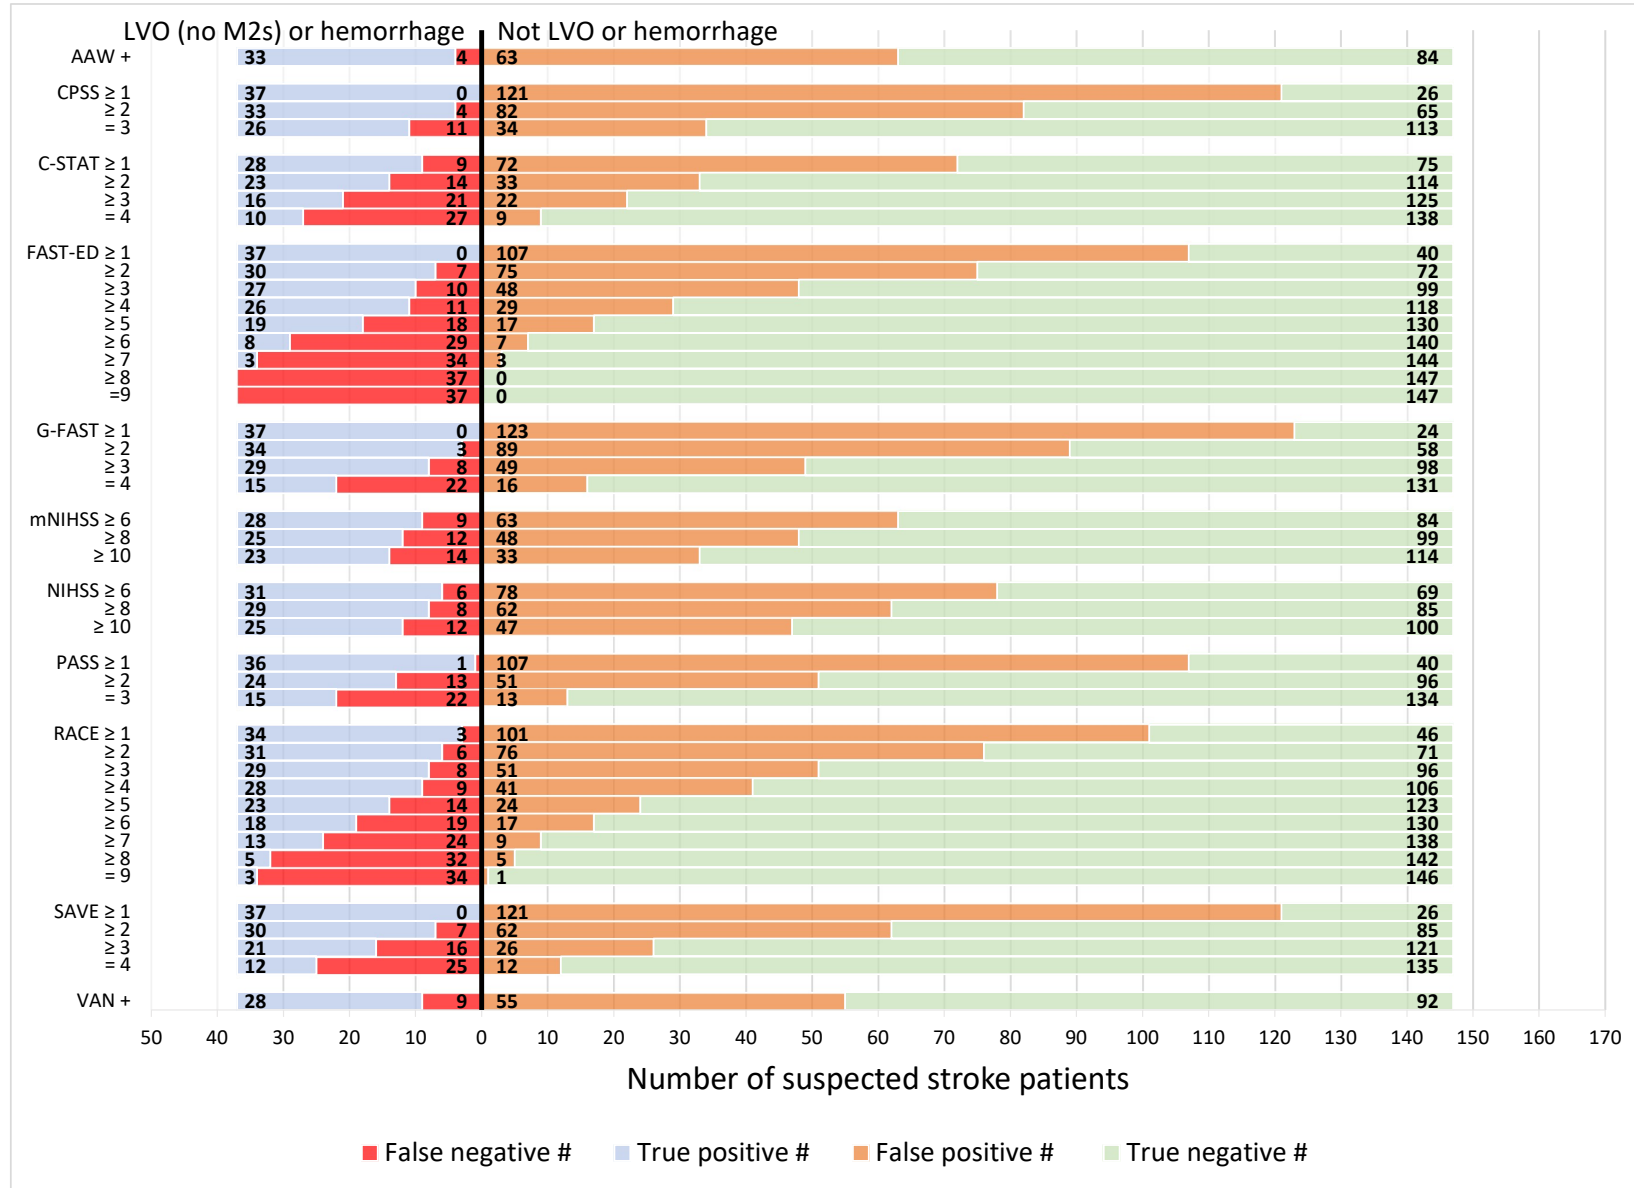

**Supplemental Figure 4.** Classification counts by scale threshold for the reference standard of LVO stroke (ICA, M1, M2, or basilar occlusions) or intracranial hemorrhages.

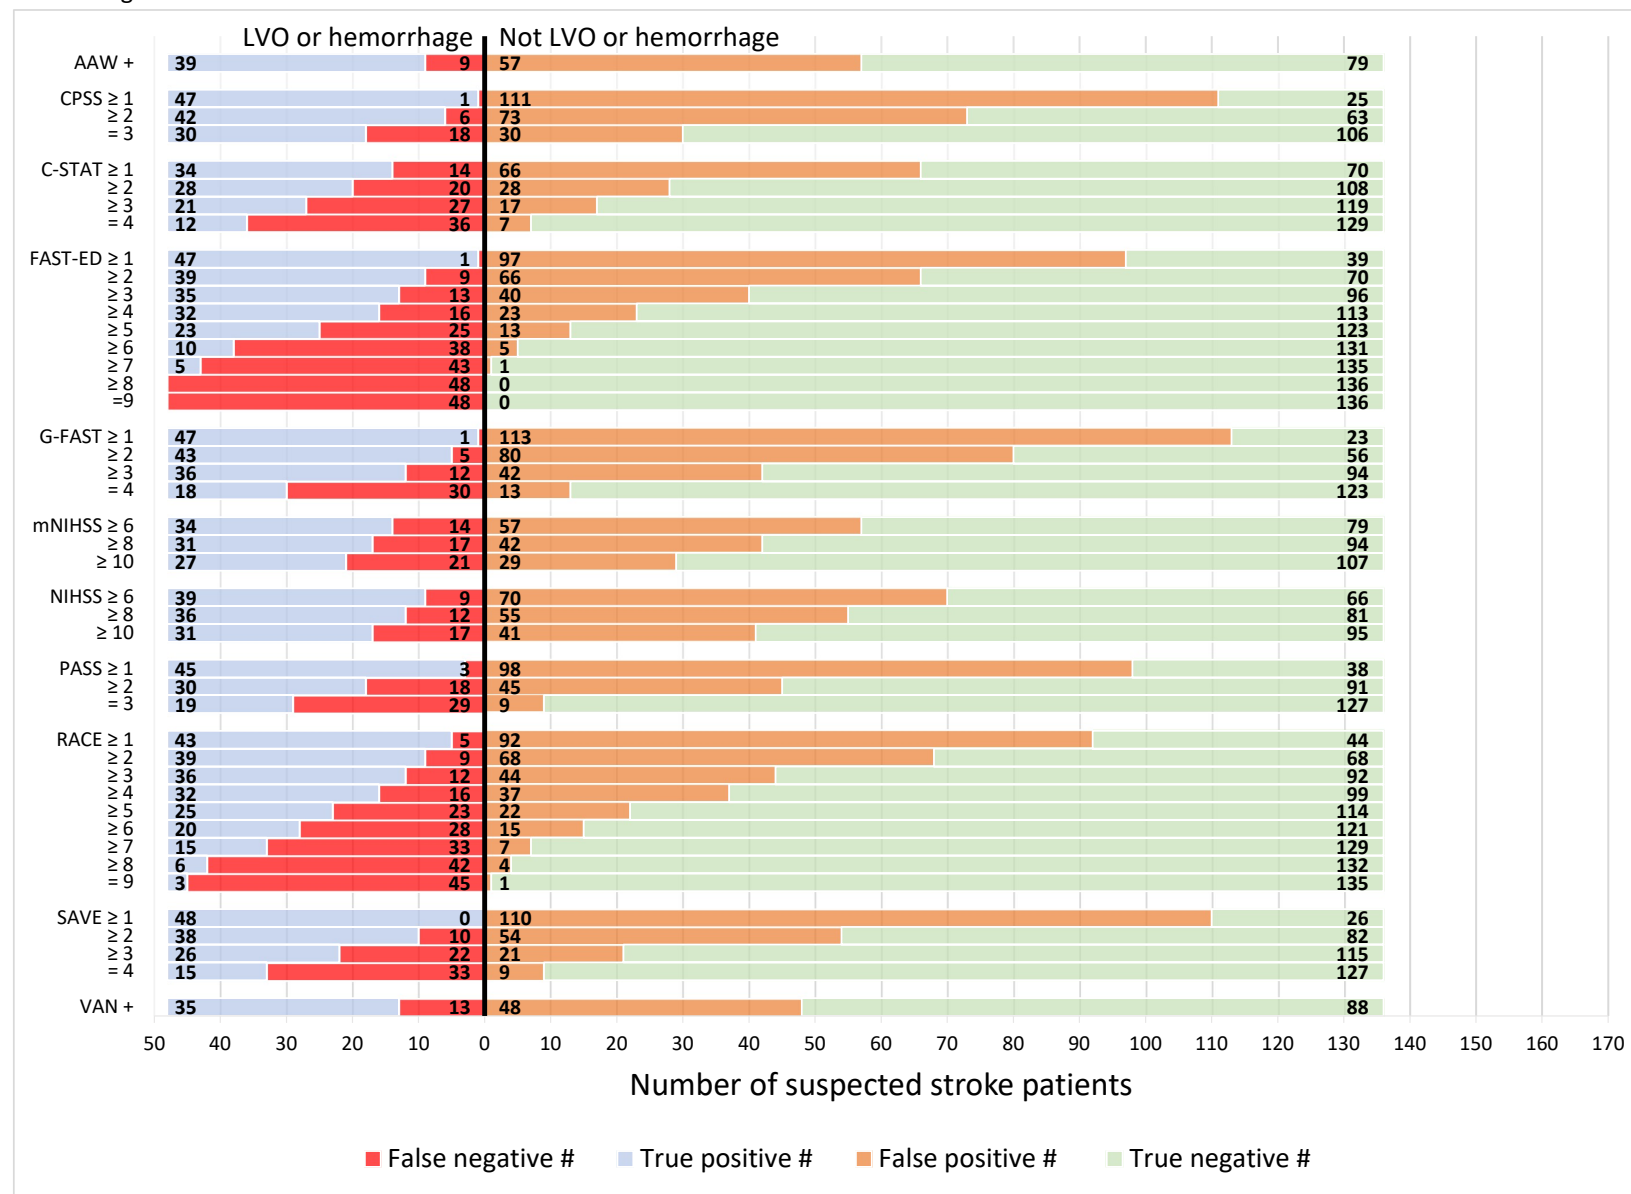

**Supplemental Figure 5.** Receiver operating characteristic curves of scales for the reference standard of LVO stroke excluding M2s (ICA, M1, or basilar occlusions) with areas under the curve (AUCs).

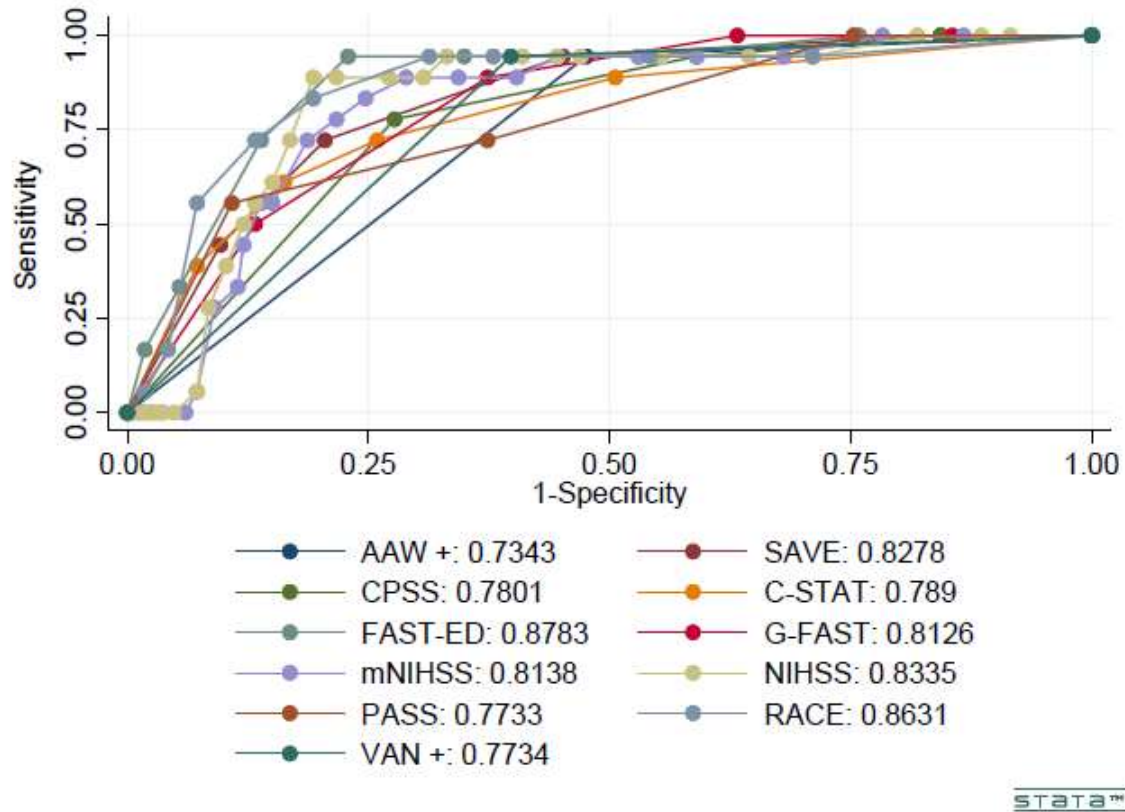

**Supplemental Figure 6.** Receiver operating characteristic curves of scales for the reference standard of LVO stroke (ICA, M1, M2, or basilar occlusions) with areas under the curve (AUCs).

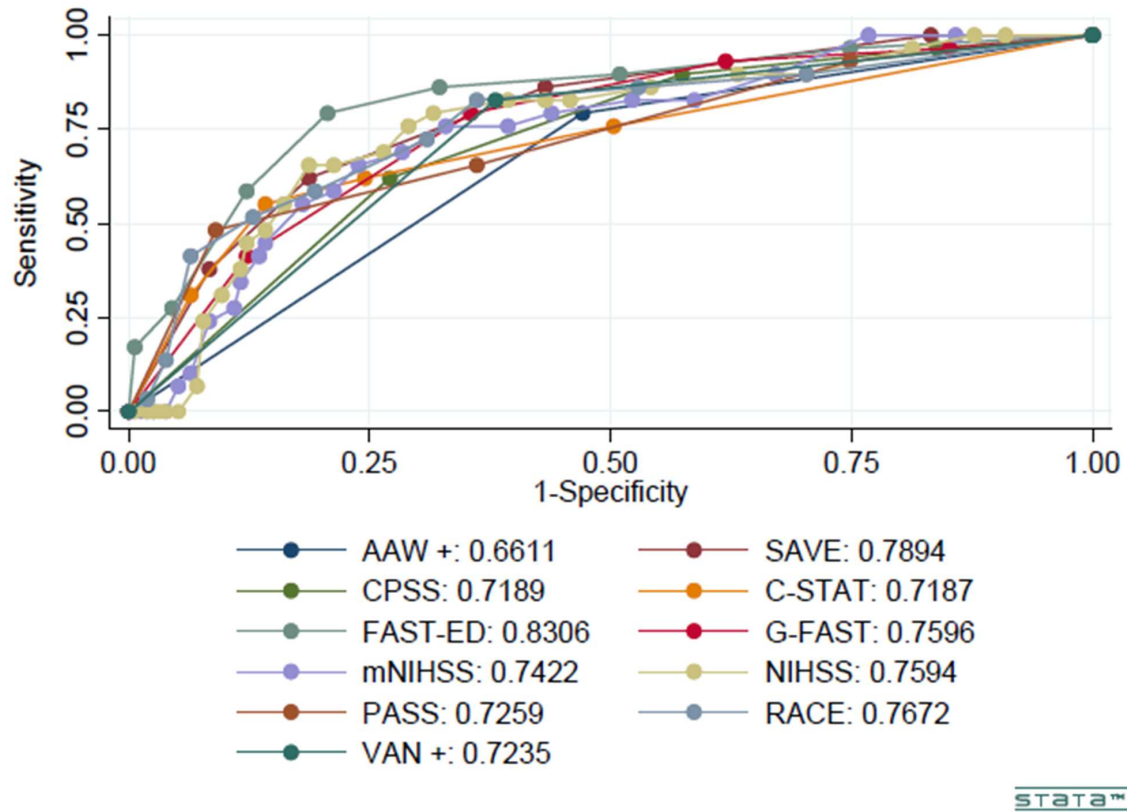

STATA™

**Supplemental Figure 7.** Receiver operating characteristic curves of scales for the reference standard of either LVO stroke excluding M2s (ICA, M1, or basilar occlusions) or intracranial hemorrhage with areas under the curve (AUCs).

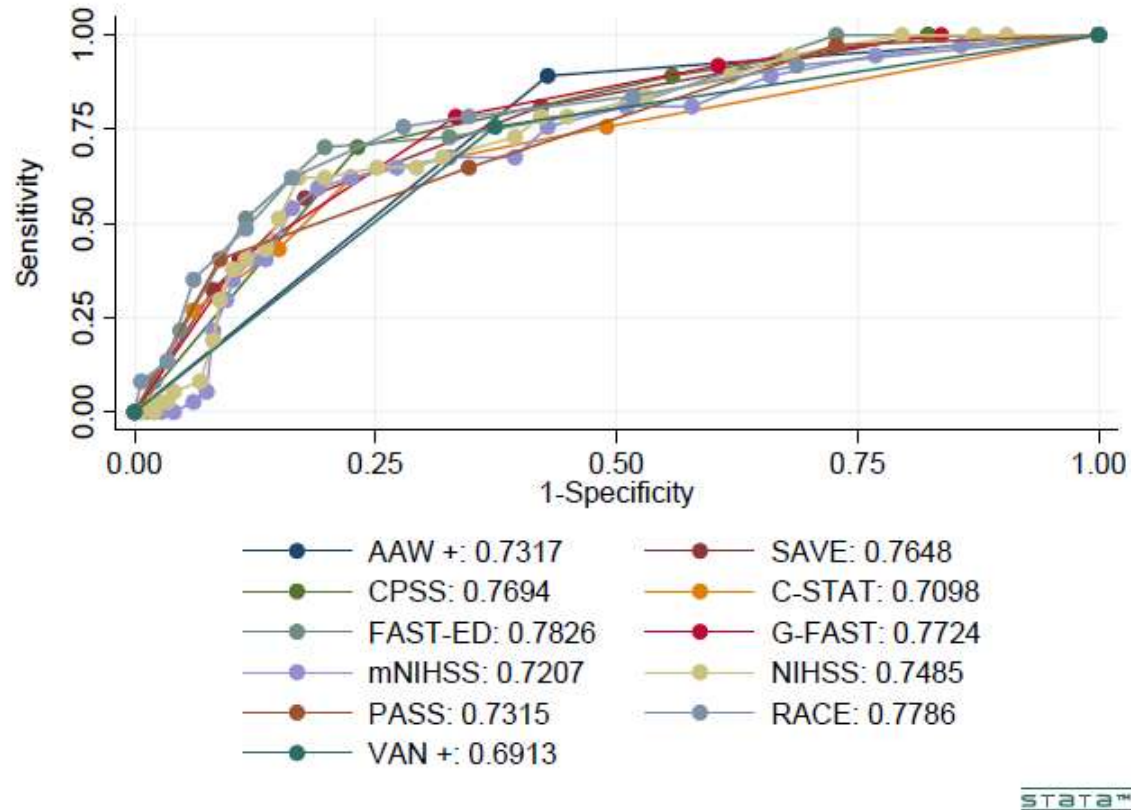

**Supplemental Figure 8.** Receiver operating characteristic curves of scales for the reference standard of either LVO stroke (ICA, M1, M2, or basilar occlusions) or intracranial hemorrhage with areas under the curve (AUCs).

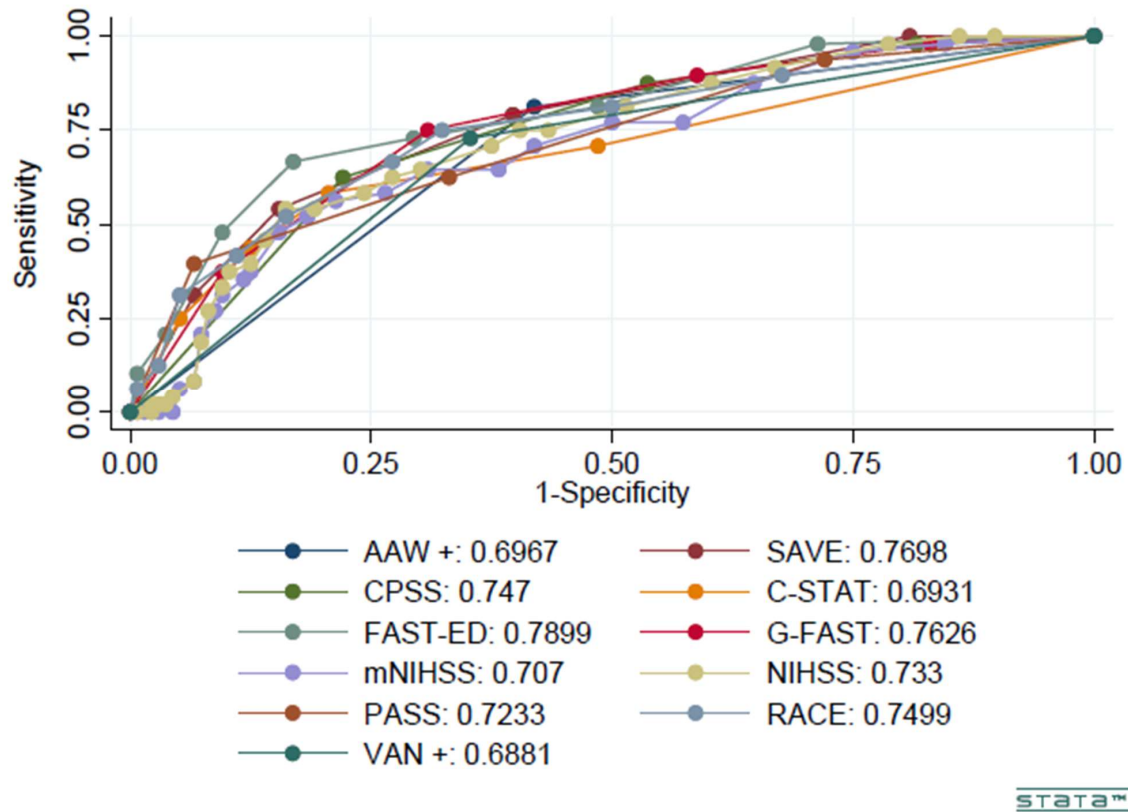

Supplement: bmjno-2022-000272supp001_data_supplement.pdf [file bmjno-2022-000272supp001_data_supplement.pdf]
